# Supplementary material
Source: PubMed Central journal article supplement (PMC8126954)
Supplement: EMBJ-40-e106632-s004.pdf [file EMBJ-40-e106632-s004.pdf]

## Expanded View Figures

### Figure EV1. CAF-1 promotes HIV-1 latency.

- A Mass spectrometry (MS) result of naïve and TNF $\alpha$ -stimulated J-Lat 10.6 cells. Significantly changed genes were plotted as heatmap. Representative genes were shown in table aside the heatmap. The heatmap scale represented fold change of gene expression (Min: -20 fold; Max: 20 fold).
- B, C The GFP-positive percentages of heterogeneous sgCHAF1A and sgNT J-Lat 10.6 cell lines were shown as flow cytometry figure and statistical histogram. TNF $\alpha$ , SAHA and JQ-1 were used as supplements.
- D Fifteen LRAs targeting eight signaling pathways were used in heterogeneous and homogeneous CHAF1A-KO J-Lat 10.6 cell lines.
- E, F Two pseudotyped HIV-1 latency cell lines (J-Lat-NIB and J-Lat-NPB) were treated with sgCHAF1A lentiviruses, SAHA and JQ-1. The GFP-positive percentages of each group were measured. The backbones of each pseudotyped HIV-1 were also shown.
- G-J J-Lat 6.3, 8.4, 9.2 and 15.4 were treated as in Fig 1C. The reactivation efficiencies of each group were indicated by the percentages of GFP-positive cells.

Data information: Data represented mean  $\pm$  SEM in triplicate. *P*-values were calculated by Student's *t*-test. \**P* < 0.05, \*\**P* < 0.01, \*\*\**P* < 0.001.

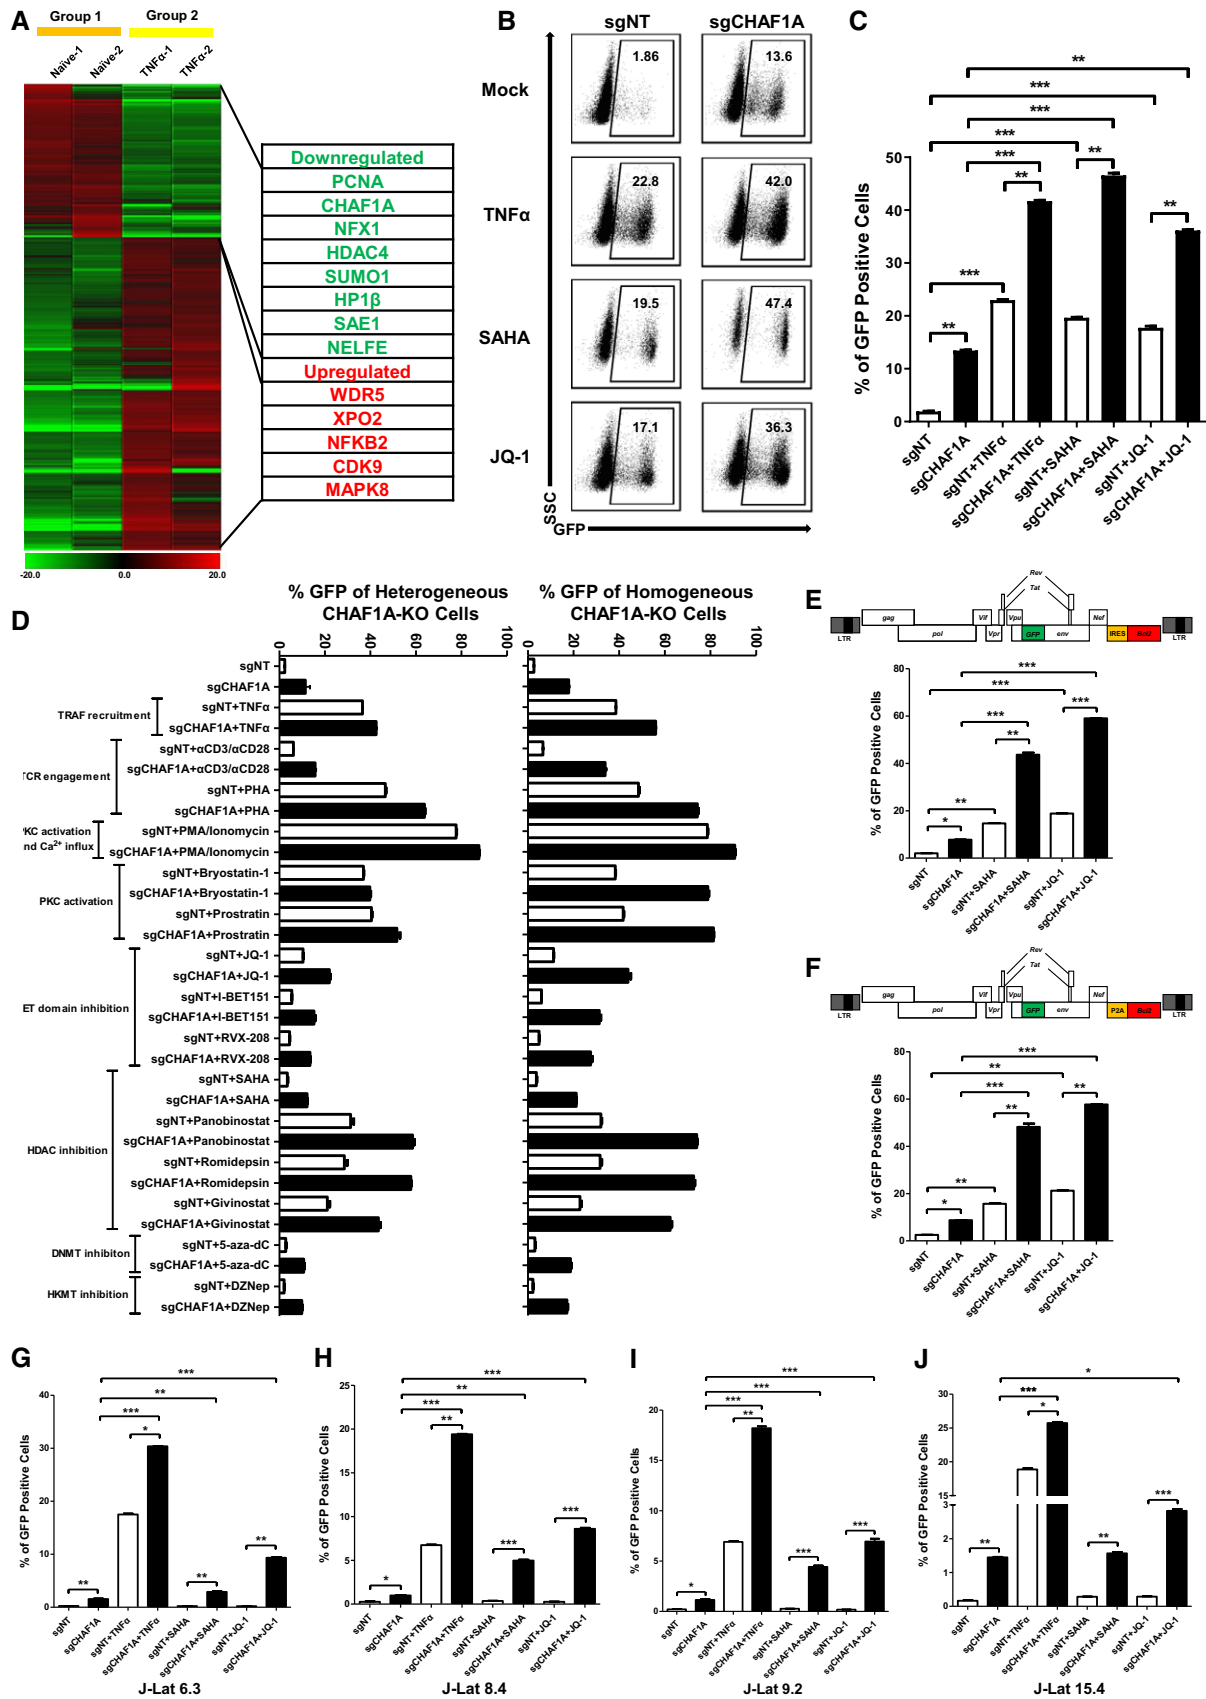

Figure EV1.

**Figure EV2. CAF-1 alters the epigenetic status of HIV-1 promoter and enriches SUMOylation system.**

- A ChIP assay with antibody against CHAF1A was performed in TZM-bl cells as in Fig 1D. ChIP-qPCR DNA signals were normalized to Input. G5: cellular DNA and viral 5'LTR junction; L: luciferase region; G3: viral 3'LTR and cellular DNA junction. The other regions were as in Fig 1D.
- B–E ChIP assays with antibodies against H3K9me, H3K9me2, H3K27me3 and H3K36me2 were performed as in Fig 1F.
- F The schematic of CpGs on HIV-1 LTR of J-Lat 8.4. Eleven CpGs were shown in circles.
- G, H The flow cytometry figures and Methyl-CpGs graphs of J-Lat 8.4 which were treated with shCHAF1A and 5-aza-dC, corresponding to statistical histograms in Fig 1J and K.
- I RNA-Seq result of wild-type and CHAF1A-KO J-Lat 10.6. Differentially expressed genes were filtered with  $\log_2FC$  of 1 and  $P$ valueFDR cutoff of 0.05. Upregulated and downregulated genes were labeled as red and blue dots, respectively. Representative genes were labeled aside corresponding dots.
- J Flag-tagged TRIM28, SUMO1, SUMO2 and SUMO4 were co-overexpressed with HA-tagged CHAF1A. HA-tagged CHAF1A was IP with anti-HA beads. Both total and IP samples were IB with anti-HA, anti-Flag and anti-Actin antibodies.
- K HA-tagged CHAF1A and HA-tagged GFP were co-overexpressed with Flag-tagged CDK9. HA-tagged proteins were immunoprecipitated (IP) with anti-HA beads. Both total and IP samples were immunoblotted (IB) with anti-HA, anti-Flag and anti-GAPDH antibodies.
- L HA-tagged CDK9 was co-overexpressed with Flag-tagged SUMO4, UBC9, and TRIM28. siRNAs targeting TRIM28 and CHAF1A treated CDK9-overexpressed HeLa cells, respectively. CDK9 was IP with anti-HA beads. Both total and IP samples were IB with anti-HA, anti-Flag and anti-GAPDH antibodies.

Data information: Data represented mean  $\pm$  SEM in triplicate.  $P$ -values were calculated by Student's  $t$ -test. \* $P$  < 0.05, \*\* $P$  < 0.01, \*\*\* $P$  < 0.001.

Source data are available online for this figure.

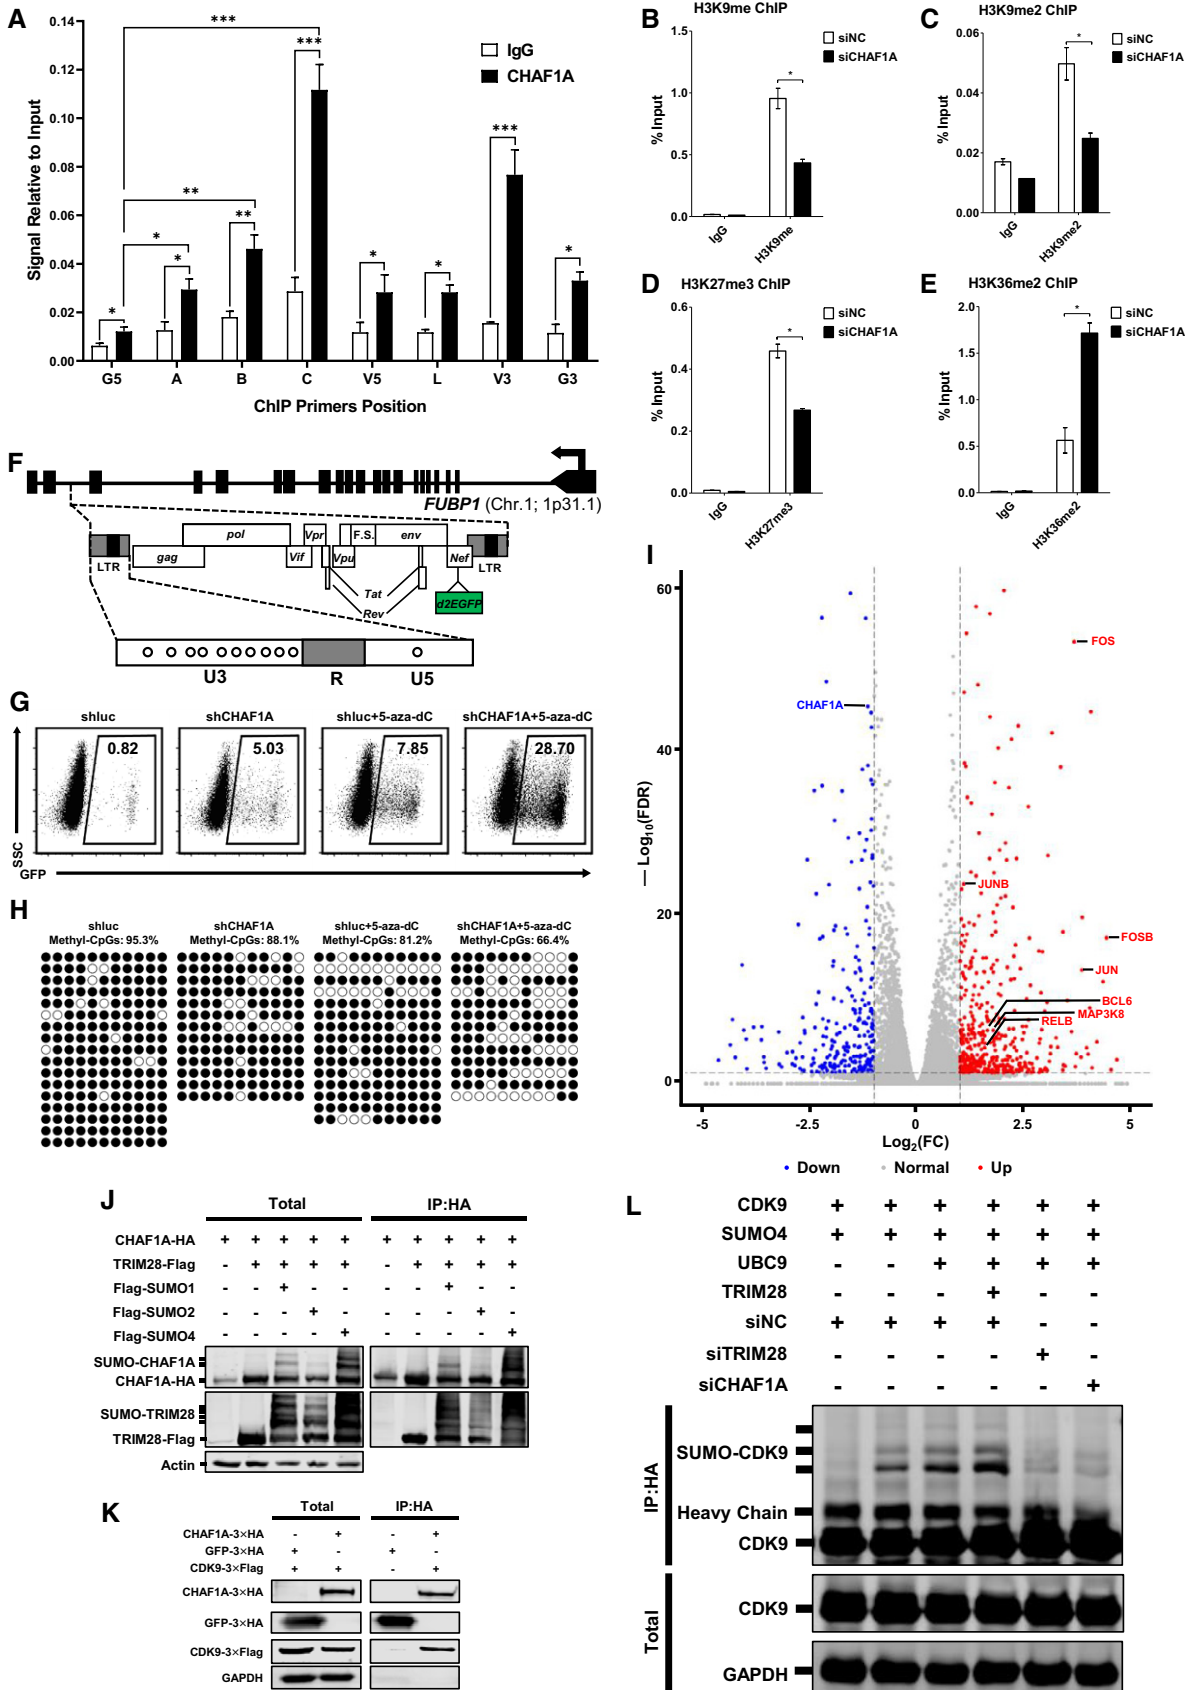

Figure EV2.

**Figure EV3. CAF-1 forms nuclear bodies.**

- A GFP-tagged CHAF1A was imaged with AF594-tagged antibody against CHAF1A.
- B RFP-tagged CHAF1A was imaged with AF488-tagged antibody against CHAF1A.
- C, D The endogenous CHAF1A was imaged before (C) and after (D) CHAF1A knockdown in J-Lat 10.6 cells.
- E, F Coilin and Pho-Ser5-RNAP II were immunostained with corresponding antibodies and imaged with CHAF1A, respectively.
- G–L CHAF1B, RBBP4, PCNA, SUV39H2, HP1 $\beta$ , and HP1 $\gamma$  was co-overexpressed with CHAF1A, respectively. SIM images were captured for each combination.
- M RFP-tagged PCNA and GFP-tagged DNMT1 were imaged with AF647-tagged antibody against CHAF1A simultaneously. DAPI was used to dye DNA.
- N RFP-tagged HP1 $\alpha$ , GFP-tagged DNMT1, and BFP-tagged PCNA were imaged with AF647-tagged antibody against CHAF1A simultaneously.
- O–R CBX4, SUZ12, SUMO1, and SUMO2 were imaged with CHAF1A, respectively.

Data information: Scale bar represented 5  $\mu$ m. At least three images were captured for each sample.

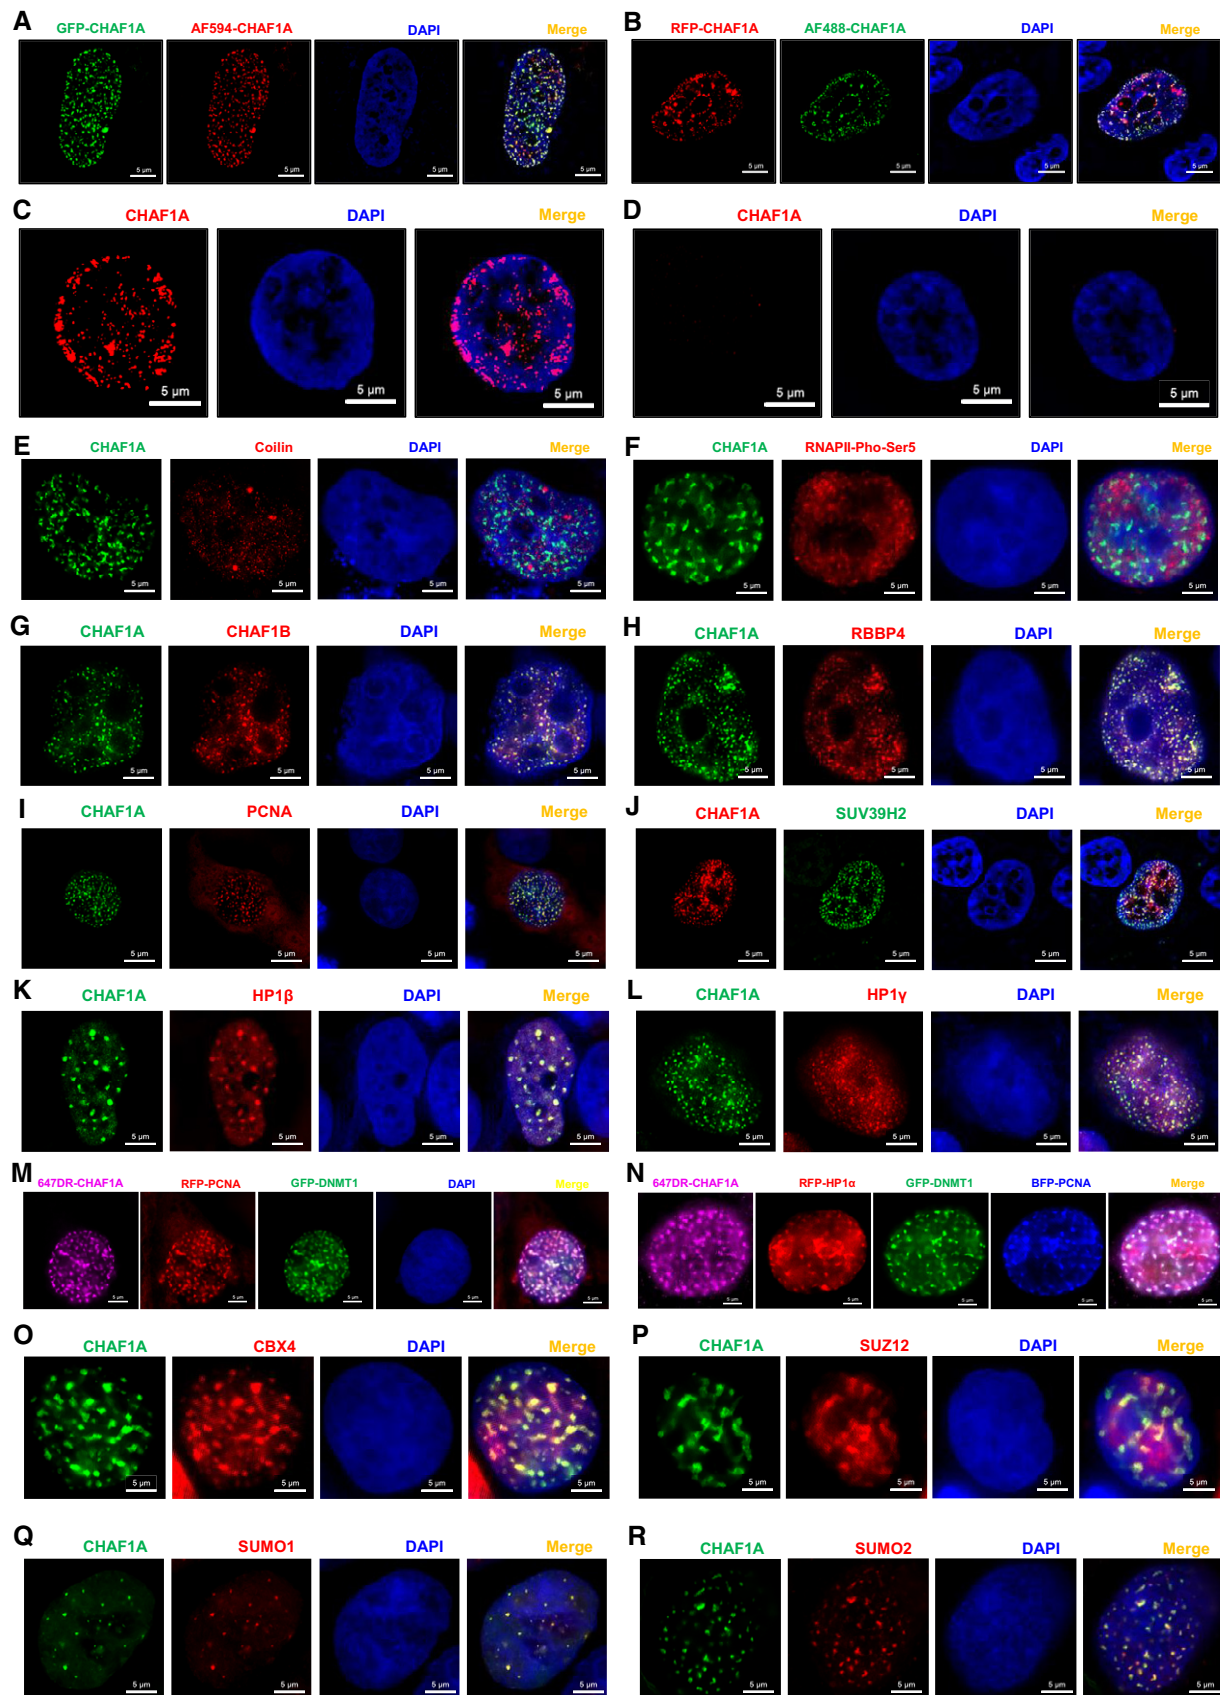

Figure EV3.

**Figure EV4. The influence of different CHAF1A mutants on CAF-1 body and the epigenetic status of HIV-1 promoter.**

- A The distribution of CHAF1A-PIP2-C. PIP2: the second PCNA-interacting protein motif which located after KER. C: CHAF1A C-terminal.
- B The co-localization of RFP-tagged SUMO1, SUMO2 and SUMO4 with GFP-tagged CHAF1A-dDS13.
- C The distribution of CHAF1A-dDS13-dSIM.
- D–F The enrichment of CHAF1A, H4K20me3 and H3K9Acetyl on HIV-1 LTR in different CHAF1A status.

Data information: The scale bar in (A–C) represented 5  $\mu$ m. Data in (D–F) represented mean  $\pm$  SEM in triplicate. *P*-values were calculated by Student's *t*-test. \**P* < 0.05, \*\**P* < 0.01.

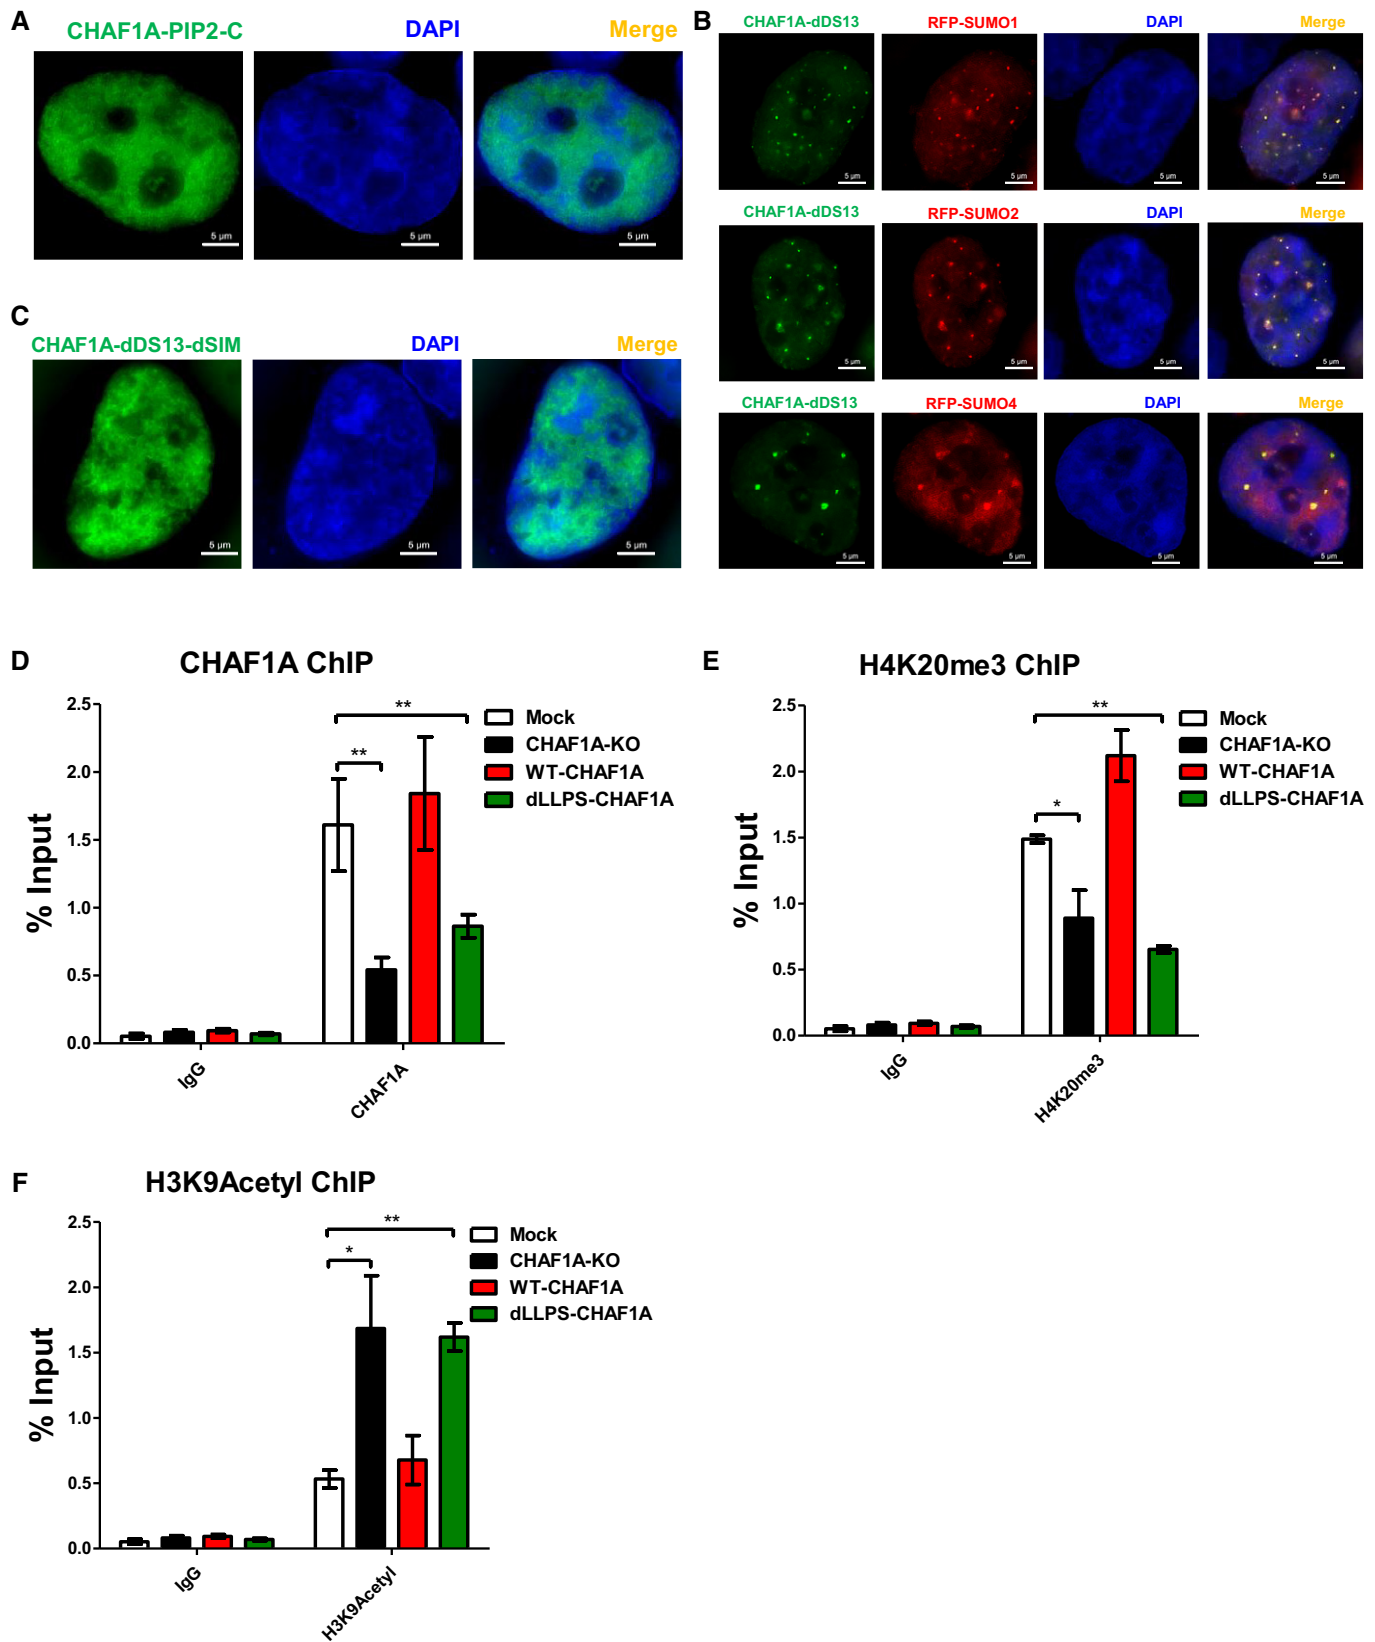

Figure EV4.



**Figure EV5. CHAF1A depletion reactivates latent HIV-1 in primary CD4<sup>+</sup> T cells.**

- A The procedure of CHAF1A-mediated HIV-1 integration restriction. On Day -4, primary CD4<sup>+</sup> T cells were isolated from PBMCs of healthy donors, followed by the activation of PHA. On Day -2, endogenous CHAF1A was knocked down by shCHAF1A lentiviruses. Two days later, shluc- and shCHAF1A-treated cells were proceeded to the infection of pseudotyped HIV-1. Another 4 days later, the percentages of GFP-positive cells, which indicated the reactivation efficiency, were measured by FCM.
- B The schematic of pseudotyped HIV-1 backbone used in (A).
- C, D The FCM figures and statistical histogram of shluc- and shCHAF1A-treated groups.
- E The procedure of CHAF1A-mediated delay of HIV-1 entering into latency. On Day -4, primary CD4<sup>+</sup> T cells were isolated and activated by PHA. On Day -2, activated CD4<sup>+</sup> T cells were washed and infected with pseudotyped HIV-1. Another 2 days later, cells were infected with shluc or shCHAF1A lentiviruses. In the following 2 weeks, the percentages of GFP-positive cells were measured by FCM every 4 days.
- F The statistical histogram of the results in (E). Data showed results from three different healthy donors.
- G The procedure of CHAF1A-mediated HIV-1 latency in wild-type HIV-1 latency model. The procedure was similar as in Fig 7A, except that the virus used in (G) was wild-type HIV-1 and the infected cells were treated with 5  $\mu$ M AZT during the 2 weeks of resting status.
- H The schematic of GFP-conjugated wild-type HIV-1 backbone used in (G).
- I, J The representative FCM figures and statistical scatter plot of the results in (G).

Data information: Data in (D) represented mean  $\pm$  SEM in triplicate. *P*-values were calculated by Student's *t*-test. Data in (J) represented mean  $\pm$  SEM in sextuplicate. *P*-values were calculated by Mann-Whitney *U*-test. \**P* < 0.05, \*\**P* < 0.01.

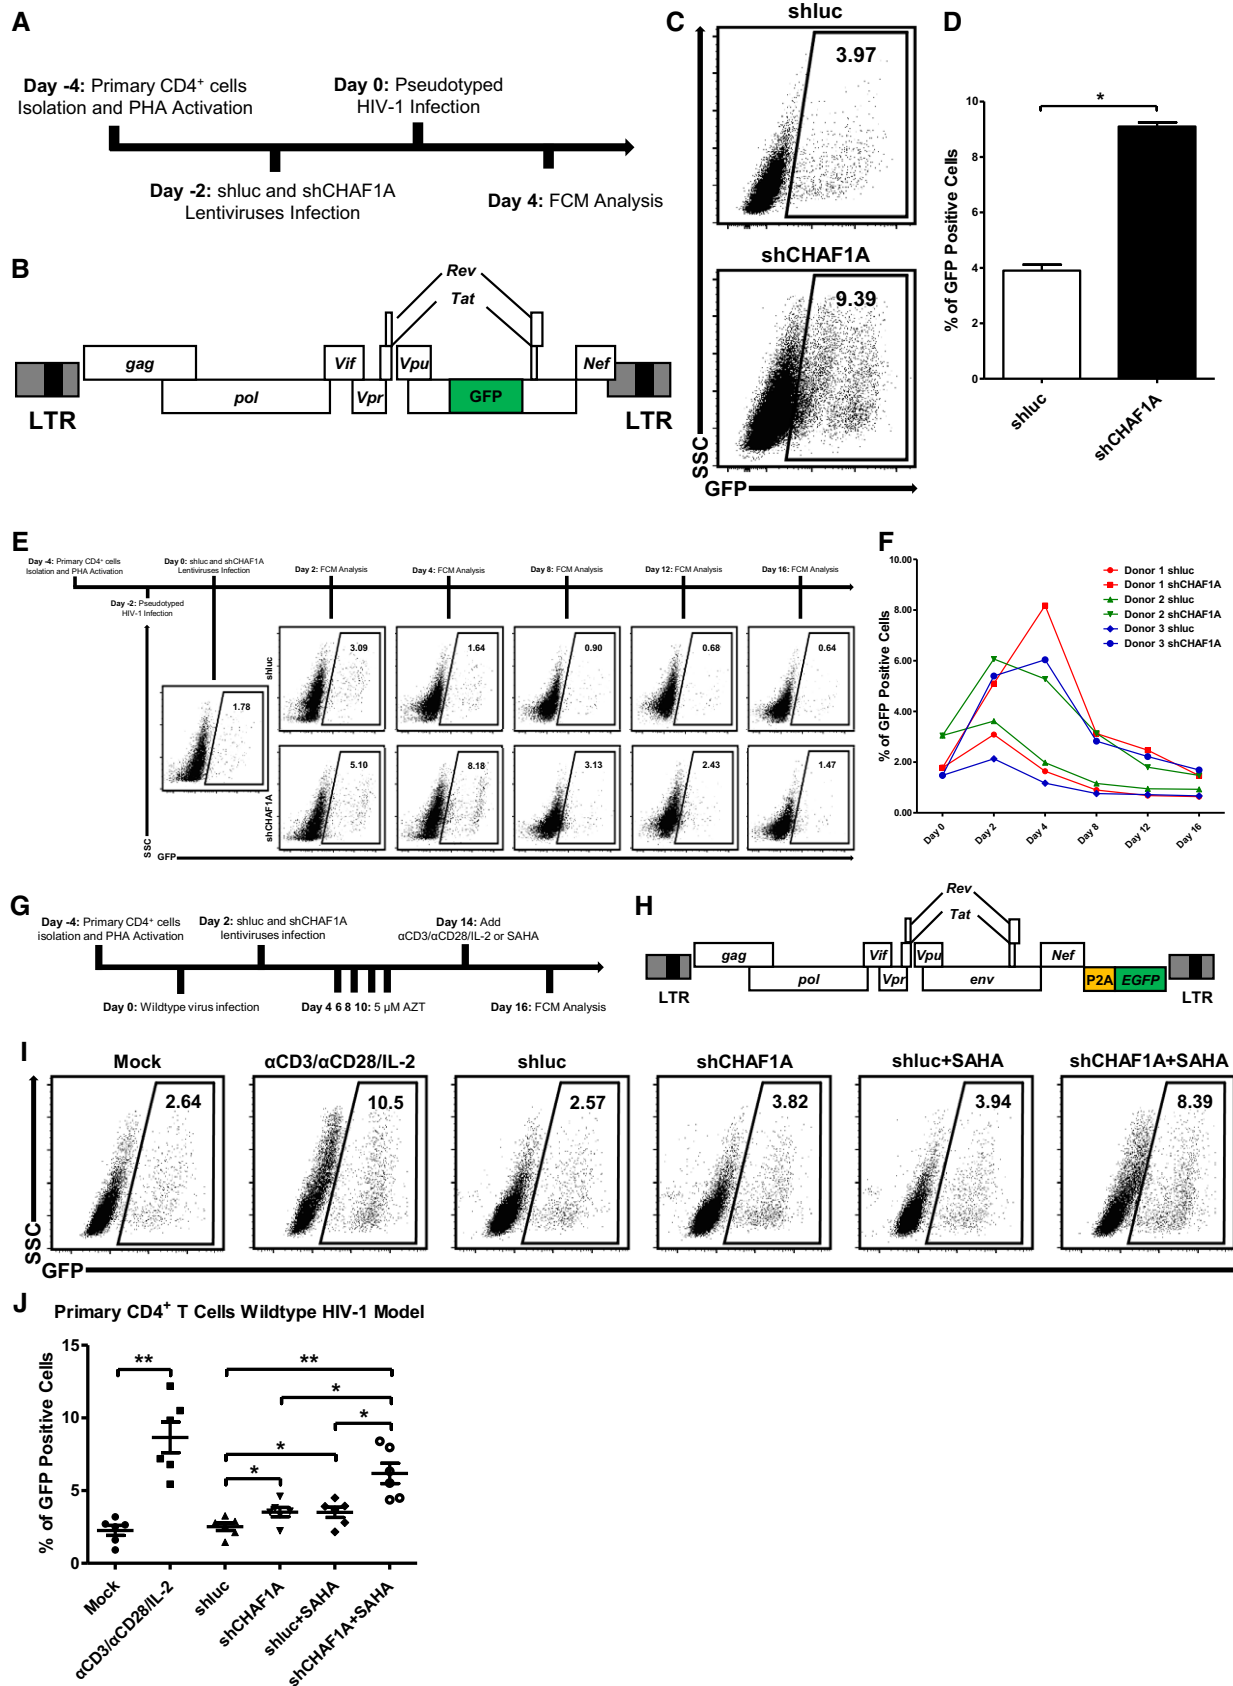

Figure EV5.
