# Supplementary material
Source: PubMed Central journal article supplement (PMC8126954)
Supplement: EMBJ-40-e106632-s009.pdf [file EMBJ-40-e106632-s009.pdf]

## **Table of Contents**

**Appendix Figure S1. Knockdown or knockout efficiencies and corresponding viabilities data.**

**Appendix Figure S2. ChIP-qPCR of different targets on HIV-1 LTR upon CHAF1A knockdown.**

**Appendix Figure S3. Co-localization analysis of CAF-1 body components.**

**Appendix Figure S4. The LLPS properties of CAF-1 bodies.**

**Appendix Figure S5. The procedure to identify the key amino acids which mediated the LLPS of CAF-1 body.**

**Appendix Figure S6. Three IDRs mediate the LLPS of CAF-1 body.**

**Appendix Figure S7. Quantification analysis of cellular bodies upon CHAF1A knockdown.**

**Appendix Figure S8. Knockdown efficiencies and corresponding viabilities in primary CD4<sup>+</sup> T cells.**

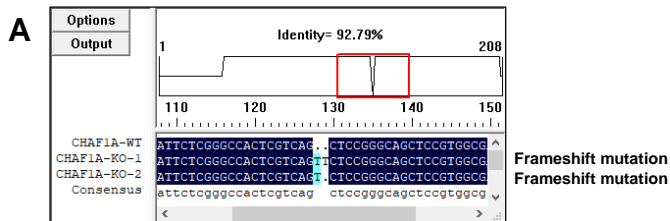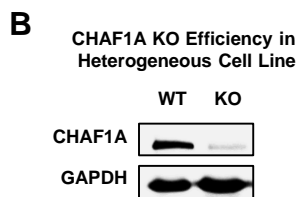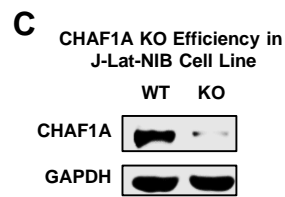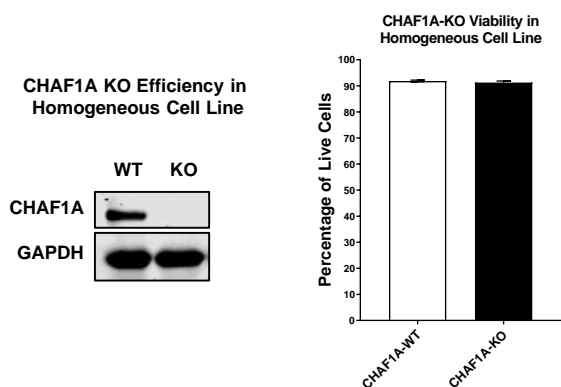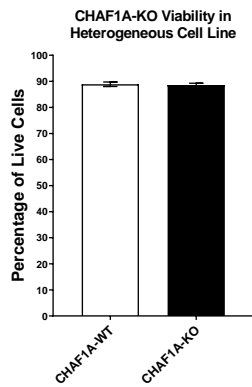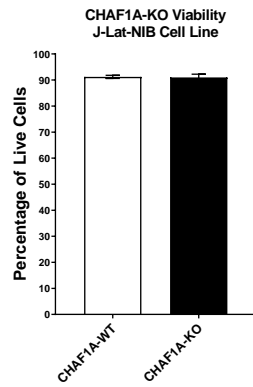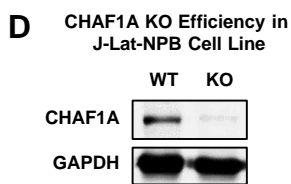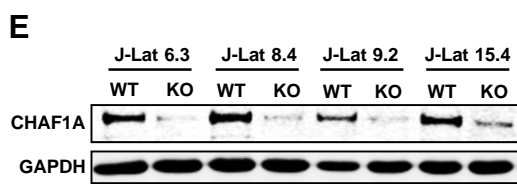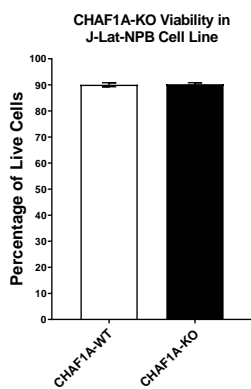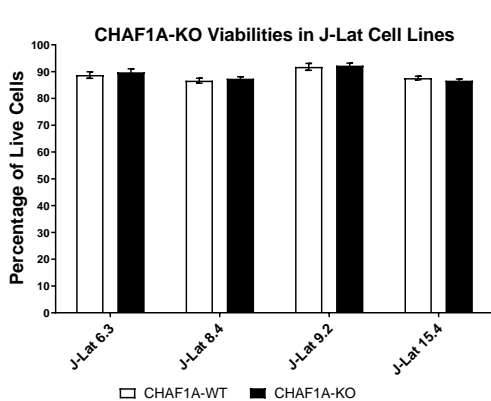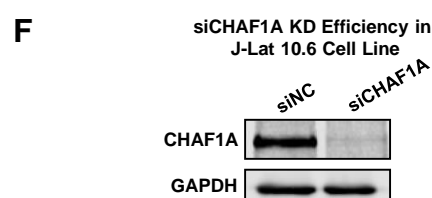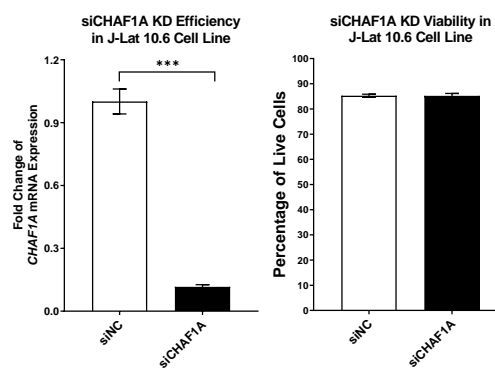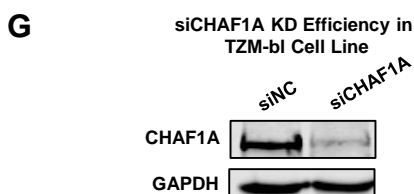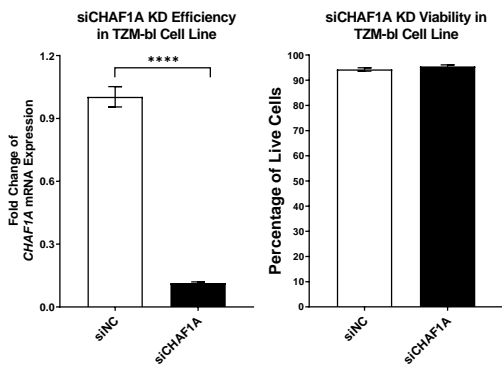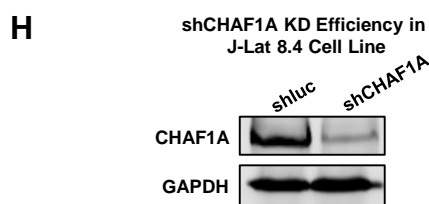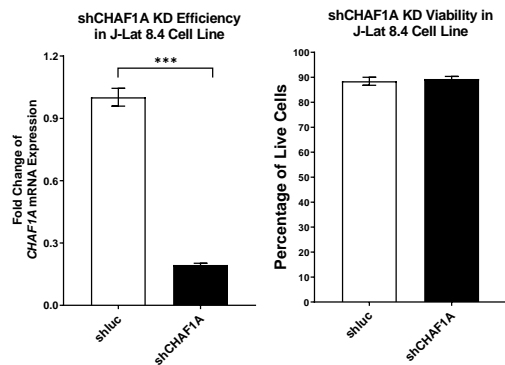

**Appendix Figure S1. Knockdown or knockout efficiencies and corresponding viabilities data.**

**A** Sequencing results of J-Lat 10.6 CHAF1A-KO homogeneous cell line (named P1D9). Both alleles of *CHAF1A* gene were frameshift mutated. The lower left panel indicated the knockout efficiency which was confirmed by WB. The lower right panel indicated the percentages of viable cells which were quantitated by measuring the percentages of amine-reactive fluorescent dye non-permeant cells.

**B-E** The knockout efficiencies in heterogeneous J-Lat 10.6 cell line, J-Lat-NIB cell line, J-Lat-NPB cell line as well as six monoclonal J-Lat cell lines (J-lat 6.3, 8.4, 9.2 and 15.4) were confirmed by WB. The corresponding viabilities upon CHAF1A knockout in each cell line were quantitated by measuring the percentages of amine-reactive fluorescent dye non-permeant cells.

**F-H** The efficiencies of siCHAF1A-mediated CHAF1A knockdown in J-Lat 10.6, siCHAF1A-mediated CHAF1A knockdown in TZM-bl and shCHAF1A-mediated CHAF1A knockdown in J-Lat 8.4 were confirmed by both WB and qPCR. The viabilities upon CHAF1A knockdown in each cell line were quantitated as in (A).

Data information: Data represented mean  $\pm$  SEM in triplicate. p-Values were calculated by Student's *t*-test. \*\*\* $p < 0.001$ , \*\*\*\*  $p < 0.0001$ .

Source data are available online for this figure.

**A**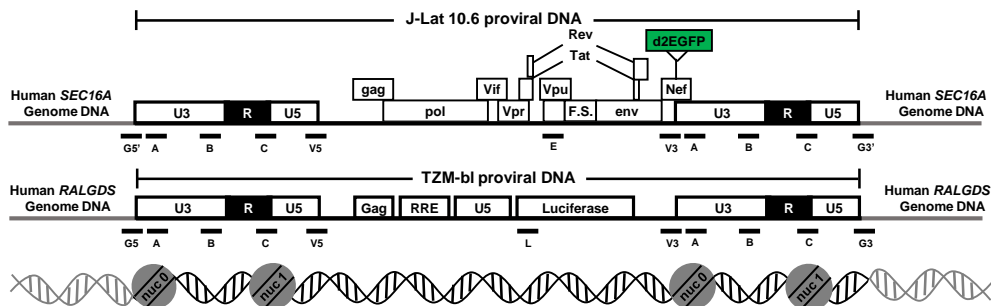**B**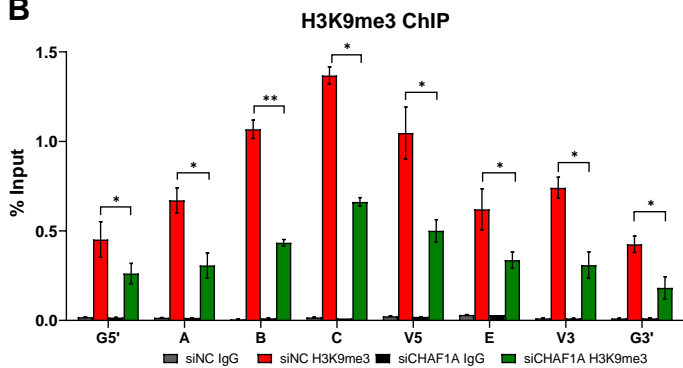**C**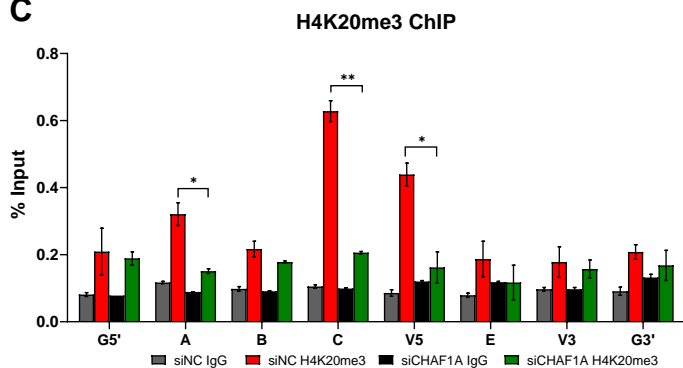**D**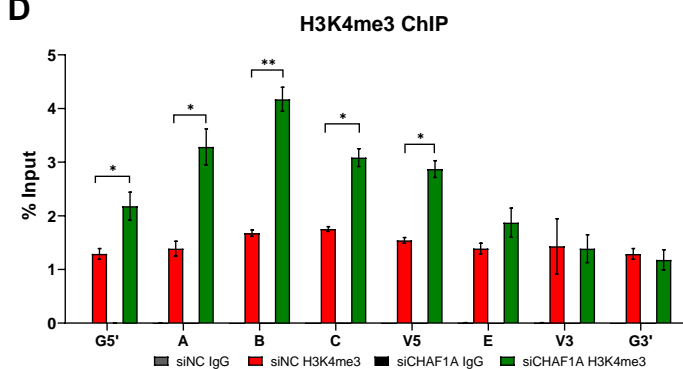**E**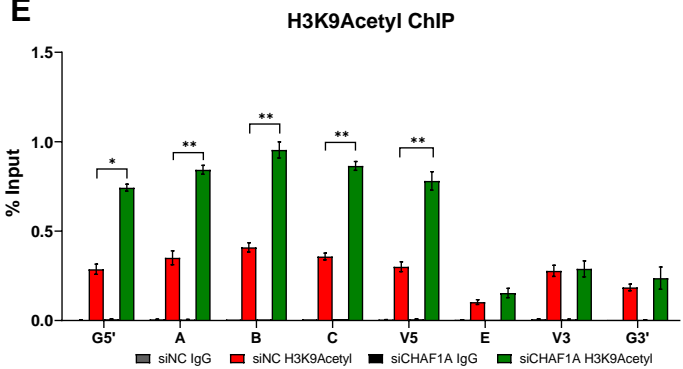**F**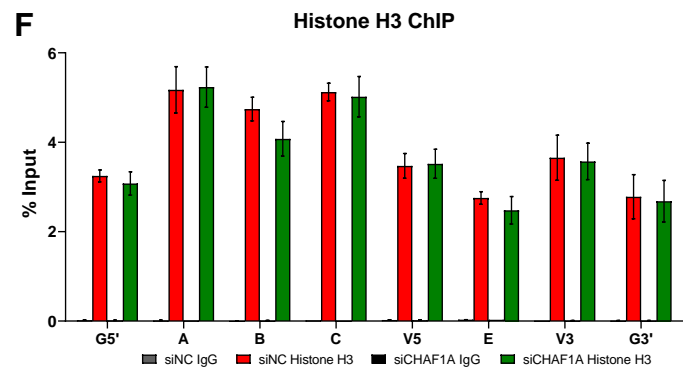**G**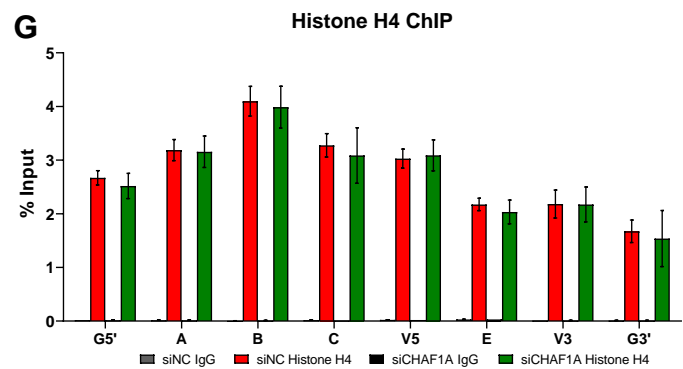**H**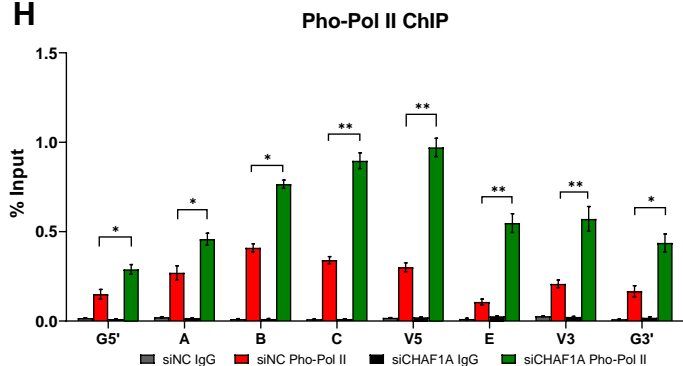**I**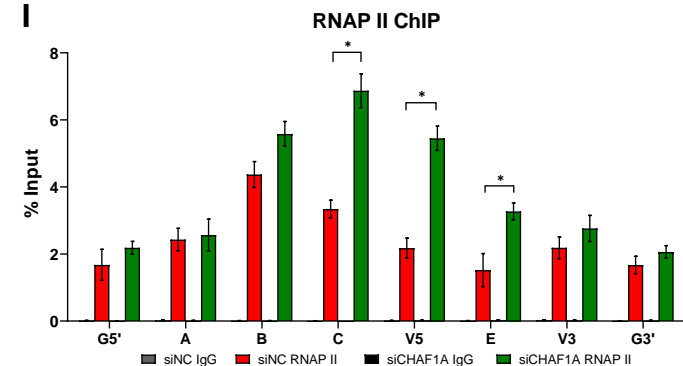

**Appendix Figure S2. ChIP-qPCR of different targets on HIV-1 LTR upon CHAF1A knockdown.**

**A** Schematic of HIV-1 proviruses within J-Lat 10.6 and TZM-bl. HIV-1 genomic DNA was integrated in the intron of cellular gene *SEC16A* in J-Lat 10.6. HIV-1 mini-genomic DNA was integrated in the intron of cellular gene *RALGDS* in TZM-bl. The ChIP-qPCR primers were indicated below each backbone. G5' represented cellular DNA and viral 5'LTR junction in J-Lat 10.6; A: Nucleosome 0 assembly site; B: Nucleosome free region; C: Nucleosome 1 assembly site; V5: Viral 5'LTR and gag leader sequence junction; E represented *envelope*; V3: Viral poly purine tract and 3'LTR junction; G3' represented viral 3'LTR and cellular DNA junction; G5 represented cellular DNA and viral 5'LTR junction in TZM-bl; L represented *luciferase* gene region; G3 represented viral 3'LTR and cellular DNA junction in TZM-bl.

**B-I** ChIP assays with antibodies against H3K9me3, H4K20me3, H3K4me3, H3K9Acetyl, Histone H3, Histone H4, Pho-Pol II and RNAP II were performed in siNC and siCHAF1A J-Lat 10.6 cells. ChIP signals along the viral genome (represented by 8 positions) within each group were normalized to Input.

Data information: Data represented mean  $\pm$  SEM in triplicate. p-Values were calculated by Student's *t*-test. \* $p < 0.05$ , \*\* $p < 0.01$ .

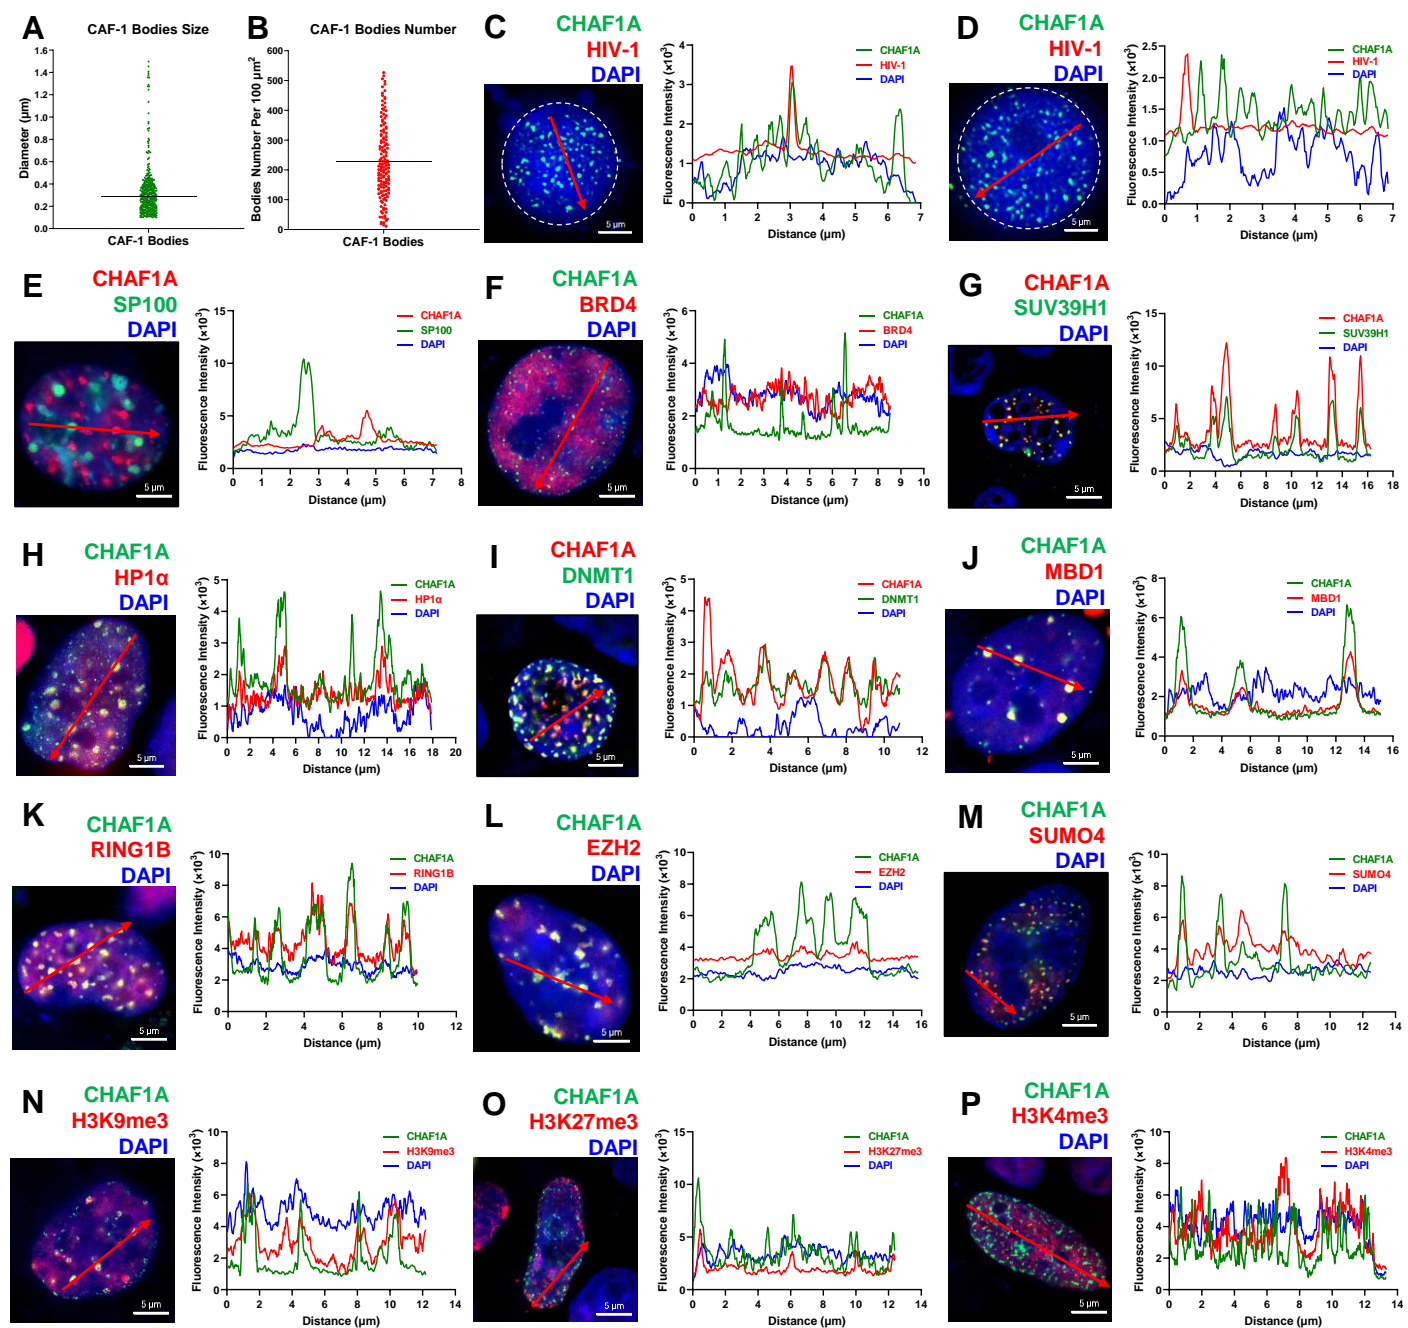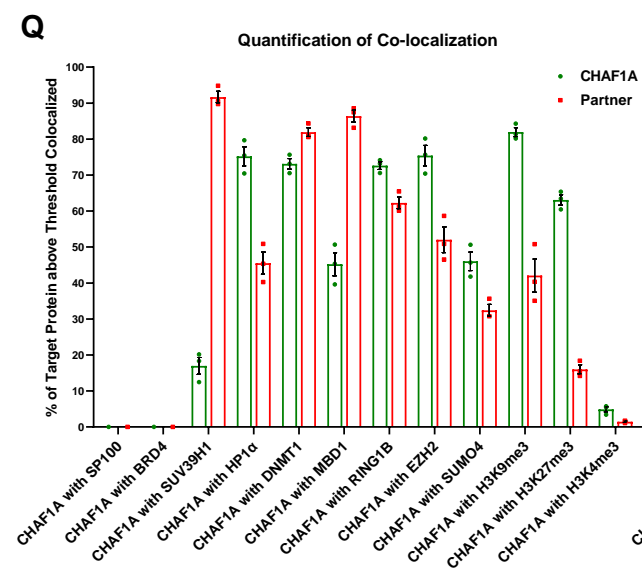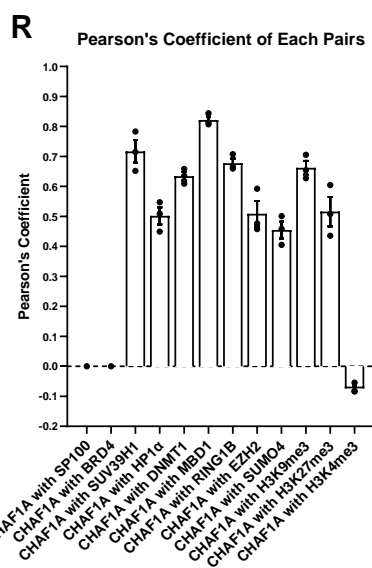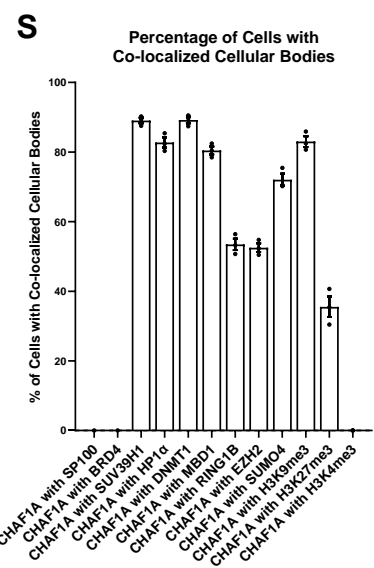

**Appendix Figure S3. Co-localization analysis of CAF-1 body components.**

**A** The distribution of CAF-1 bodies diameters. Data were collected from 30 cells of 10 samples which were prepared in 10 independent experiments.

**B** The distribution of CAF-1 bodies numbers per 100  $\mu\text{m}^2$ . Data were collected from 143 distinct nuclei sections from 50 cells of 10 samples which were prepared in 10 independent experiments.

**C, D** The line scan profiles of ImmunoFISH images which showed the positions of CHAF1A bodies and HIV-1 DNA in both naïve and activated statuses. The red arrows indicated the positions where the line scans showed.

**E-P** The line scan profiles of SIM images which showed co-localization and non-co-localization between CHAF1A and its partners.

**Q** Quantification analysis of co-localization of CHAF1A and its partners. Total volumes of CHAF1A and its partners as well as co-localized parts were measured. Percentages of CHAF1A above threshold co-localized were calculated by measuring the percentages of co-localized CHAF1A volume in total CHAF1A volume. Percentages of CHAF1A partners above threshold co-localized were calculated by measuring the percentages of co-localized target protein volume in total target protein volume.

**R** Pearson's coefficients in co-localized volume of each protein pairs were calculated based on the quantitation analysis results showed in (Q). The co-localization value ranges between 1 and -1. A value of 1 represents perfect co-localization, 0 represents no co-localization, and -1 represents perfect inverse correlation.

**S** The percentages of cells with co-localized cellular bodies.

Data information: The scale bar of each SIM image represented 5  $\mu\text{m}$ . All the samples were imaged to obtain at least three images. All the merged SIM images used for line scan profiling in (C-P) were from Fig 3C to Fig 3P.

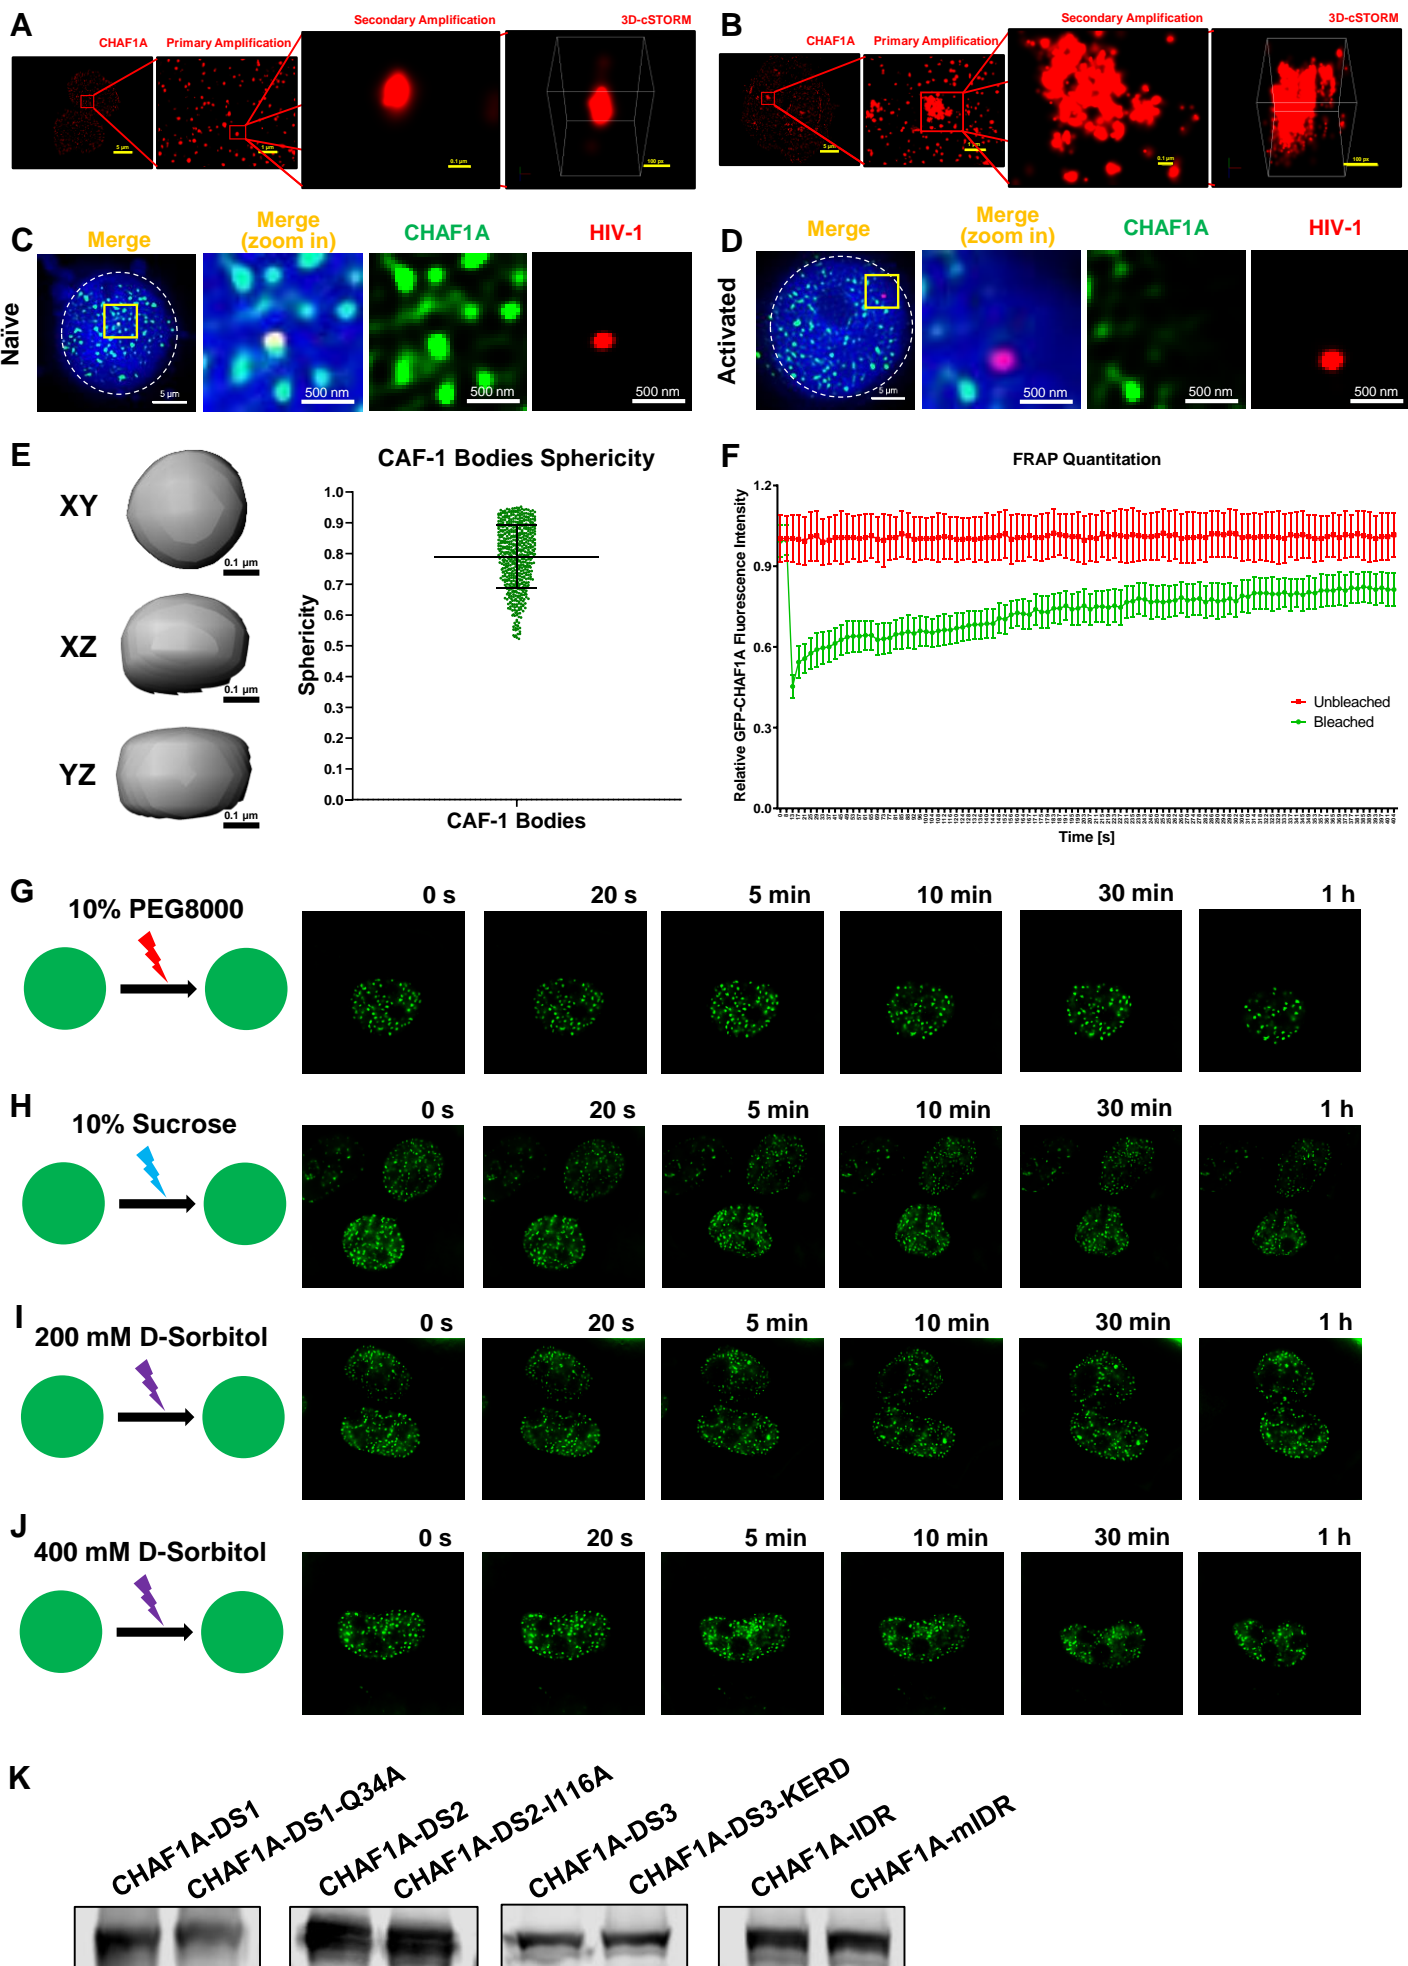



**Appendix Figure S4. The LLPS properties of CAF-1 bodies.**

**A, B** Super-resolution cSTORM images of CAF-1 bodies. Isolated and clustered CAF-1 bodies were amplified and displayed in 2D and 3D. Two degrees of amplification were performed for CAF-1 bodies.

**C, D** Amplified ImmunoFISH images of CAF-1 bodies and HIV-1 genomic DNA within J-Lat 10.6. Images showed both naïve and TNF $\alpha$ -activated J-Lat 10.6 cells.

**E** Rendered 3D shapes of CAF-1 bodies. Three panels indicated XY, XZ and YZ planes of the CAF-1 body. The right scatter plot represented the distribution of CAF-1 bodies sphericities. Data were collected from 579 CAF-1 bodies of five cells from five samples which were prepared in five independent experiments.

**F** FRAP histogram of unbleached and bleached CAF-1 bodies. Six unbleached and six bleached CAF-1 bodies from six different cells were observed to record fluorescence intensities for 404 seconds (over 6 minutes).

**G-J** GFP-CHAF1A-expressing HEK293T cells were treated with 10% PEG8000, 10% Sucrose, 200 mM D-Sorbitol and 400 mM D-Sorbitol respectively. Live cells images of pre-treatment, as well as 20 s, 5 min, 10 min, 30 min and 1 h post-treatment were captured.

**K** The expression of *in vitro* purified CHAF1A-DS1, CHAF1A-DS2, CHAF1A-DS3, CHAF1A-IDR and corresponding mutants was confirmed by WB.

Data information: The scale bar of each SIM image represented 5  $\mu$ m. The scale bars of amplified STORM images in (A) and (B) represented 1  $\mu$ m (primary amplification) and 0.1  $\mu$ m (secondary amplification). The scale bar of 3D-cSTORM represented 100 px. The scale bar of each amplified image in (C) and (D) represented 500 nm. All the samples were imaged to obtain at least three images.

Source data are available online for this figure.

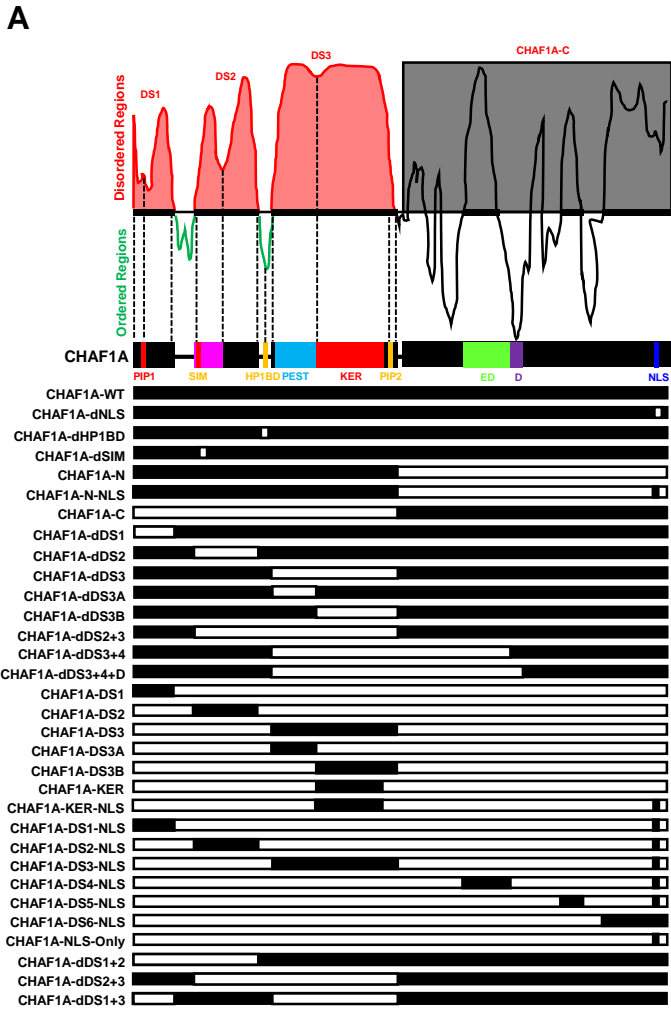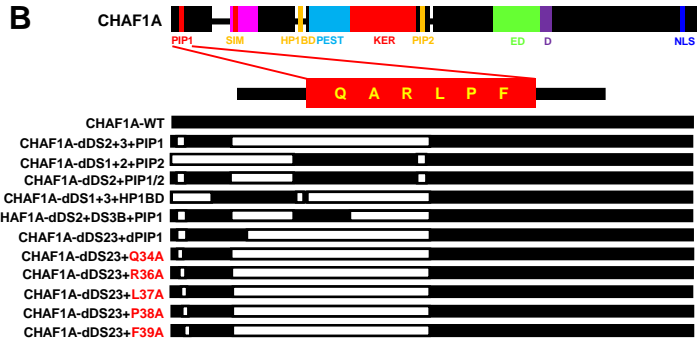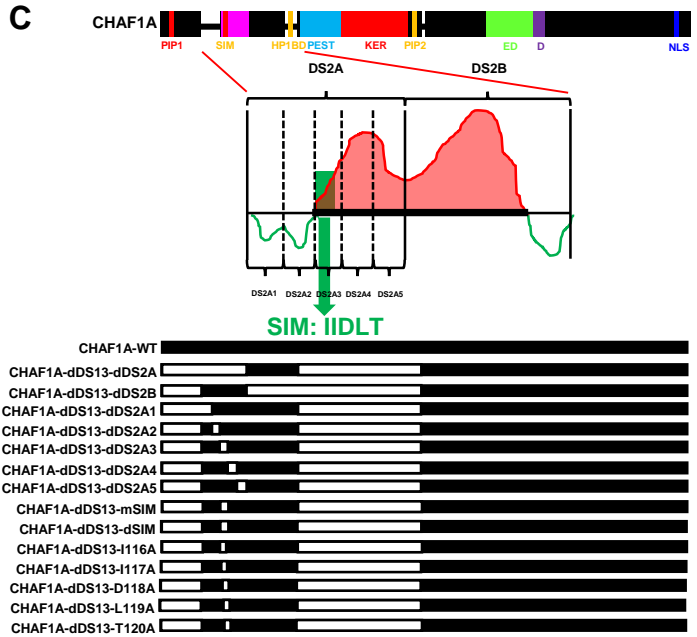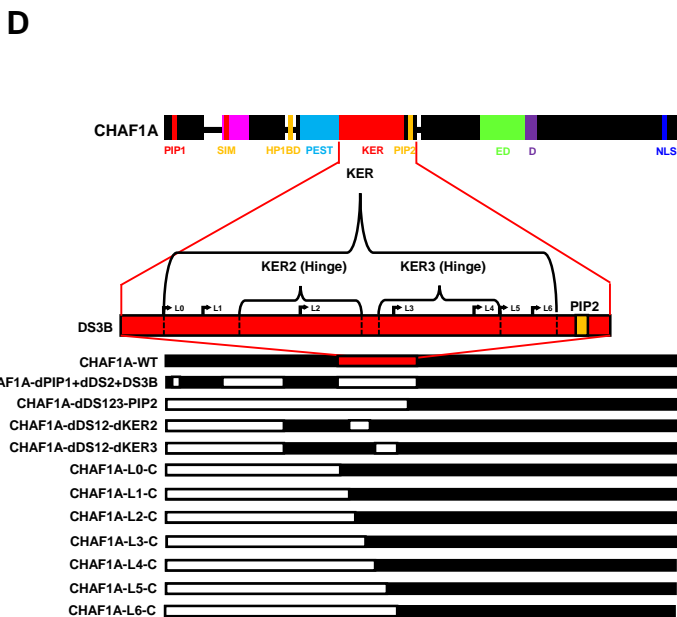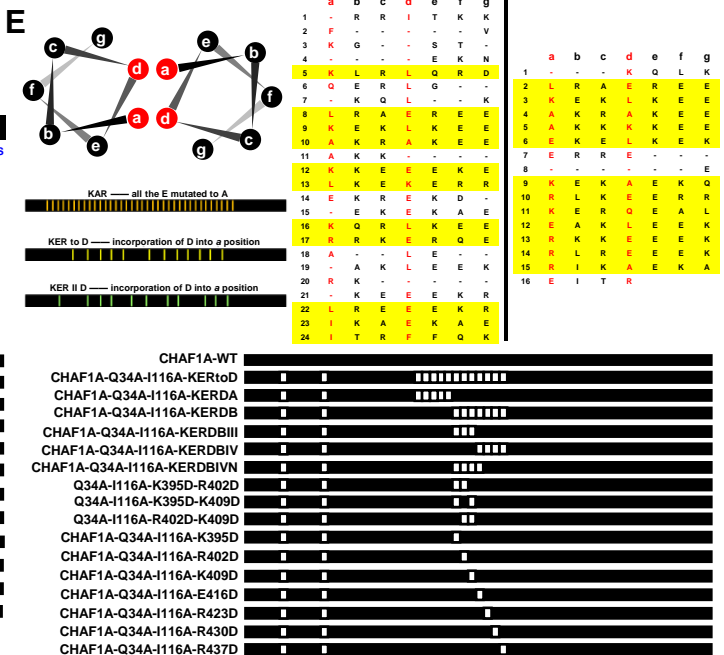

**Appendix Figure S5. The procedure to identify the key amino acids which mediated the LLPS of CAF-1 body.**

**A** Upper panel showed the schematic of CHAF1A disordered regions. Specific segments including PIP1, SIM, HP1BD, PEST, KER, PIP2, ED, D and NLS were labelled below. Lower panels of CHAF1A mutants were used to identify the IDRs which mediated the LLPS of CHAF1A.

**B** CHAF1A mutants that were used to identify the key amino acids which mediated the LLPS of DS1.

**C** CHAF1A mutants that were used to identify the key amino acids which mediated the LLPS of DS2.

**D** Segmentation strategy that was used to identify the shortest segment which mediated the LLPS of DS3.

**E** Upper panels showed the prediction results of KER coiled-coil structure and corresponding three CHAF1A mutants. The amino acids within coiled-coil interface were mutated to aspartic acid (Asp or D). The low panels of CHAF1A mutants were used to identify the minimum numbers of amino acid mutation which mediated the LLPS of DS3 and CHAF1A.

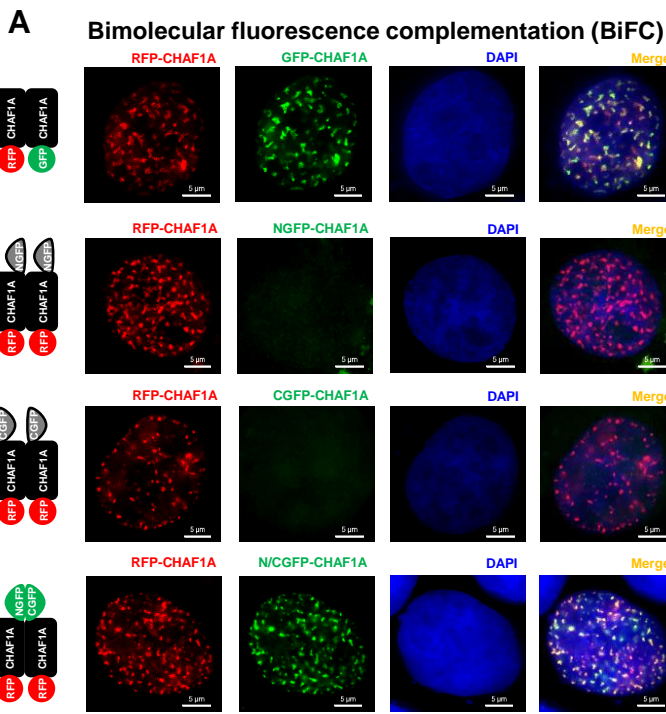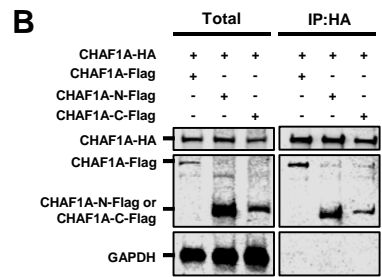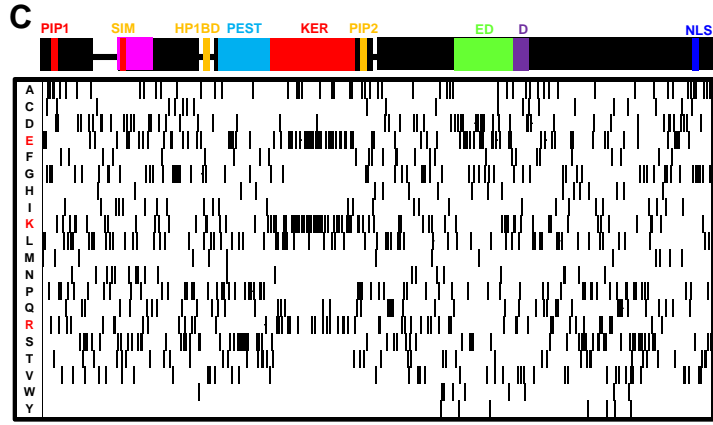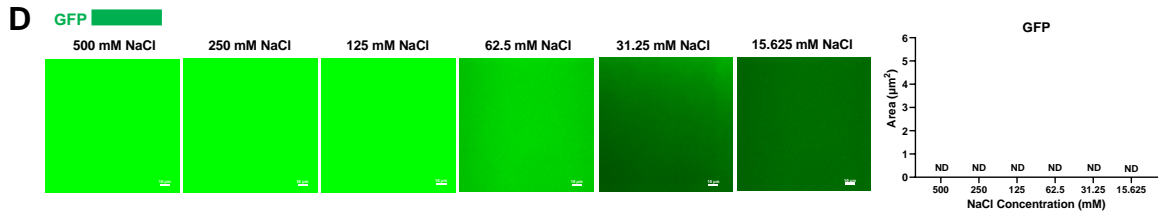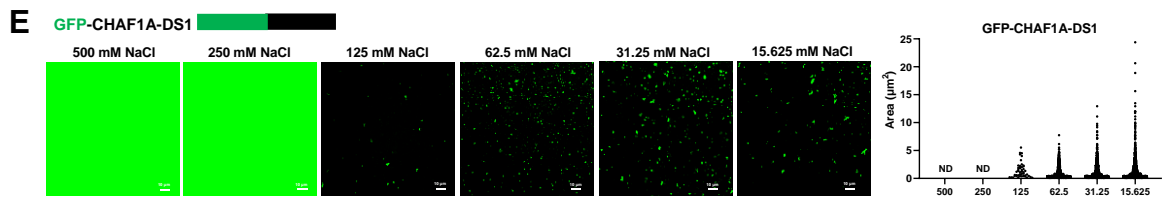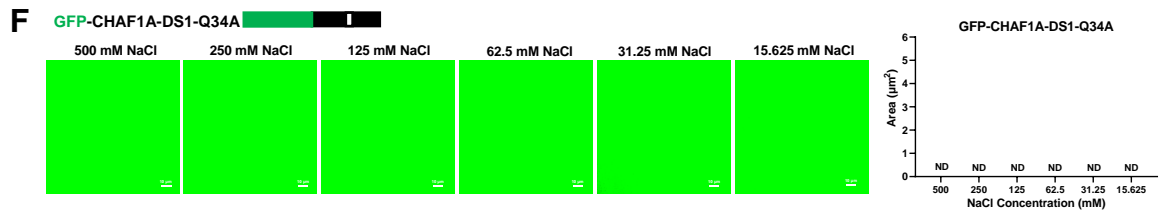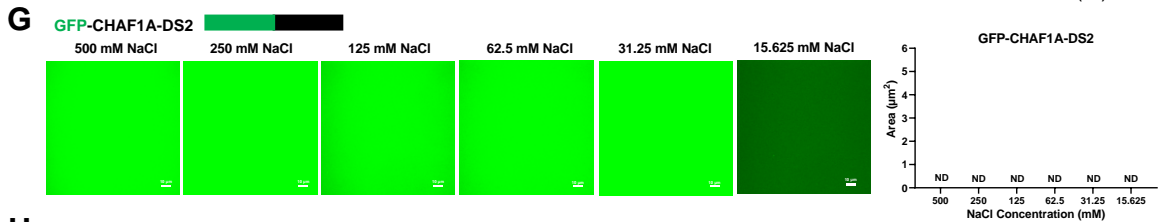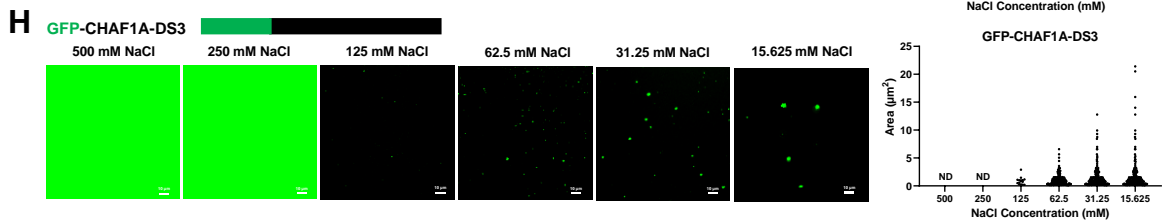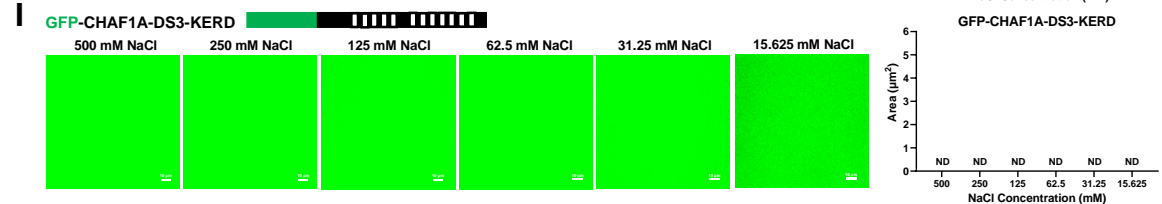

**Appendix Figure S6. Three IDRs mediate the LLPS of CAF-1 body.**

**A** Bimolecular fluorescence complementation (BiFC) experiment of CHAF1A. GFP sequence was divided into NGFP and CGFP which were conjugated to CHAF1A sequence. GFP-tagged CHAF1A, NGFP-tagged CHAF1A and CGFP-tagged CHAF1A were co-overexpressed with RFP-tagged CHAF1A respectively. The lower panel indicated that RFP-tagged, NGFP-tagged and CGFP-tagged CHAF1A were transfected simultaneously.

**B** Flag-tagged CHAF1A, Flag-tagged CHAF1A-N and Flag-tagged CHAF1A-C were co-overexpressed with HA-tagged CHAF1A. Cell lysates of each group were IP with anti-HA beads and IB with anti-HA, anti-Flag and anti-GAPDH antibodies. Both total and IP samples were developed.

**C** Composition analysis of CHAF1A protein. Lower table indicated the distribution of twenty kinds of amino acids.

**D-I** GFP, GFP-CHAF1A-DS1, GFP-CHAF1A-DS1-Q34A, GFP-CHAF1A-DS2, GFP-CHAF1A-DS3 and GFP-CHAF1A-DS3-KERD were expressed and purified *in vitro*. Ten micromole of each protein was proceeded to the droplet formation buffer which contained six concentration gradients of NaCl. Statistical analysis results of body areas and numbers were shown aside.

Data information: The scale bars in (A) represented 5  $\mu\text{m}$ . The scale bars in (D-I) represented 10  $\mu\text{m}$ .

Source data are available online for this figure.

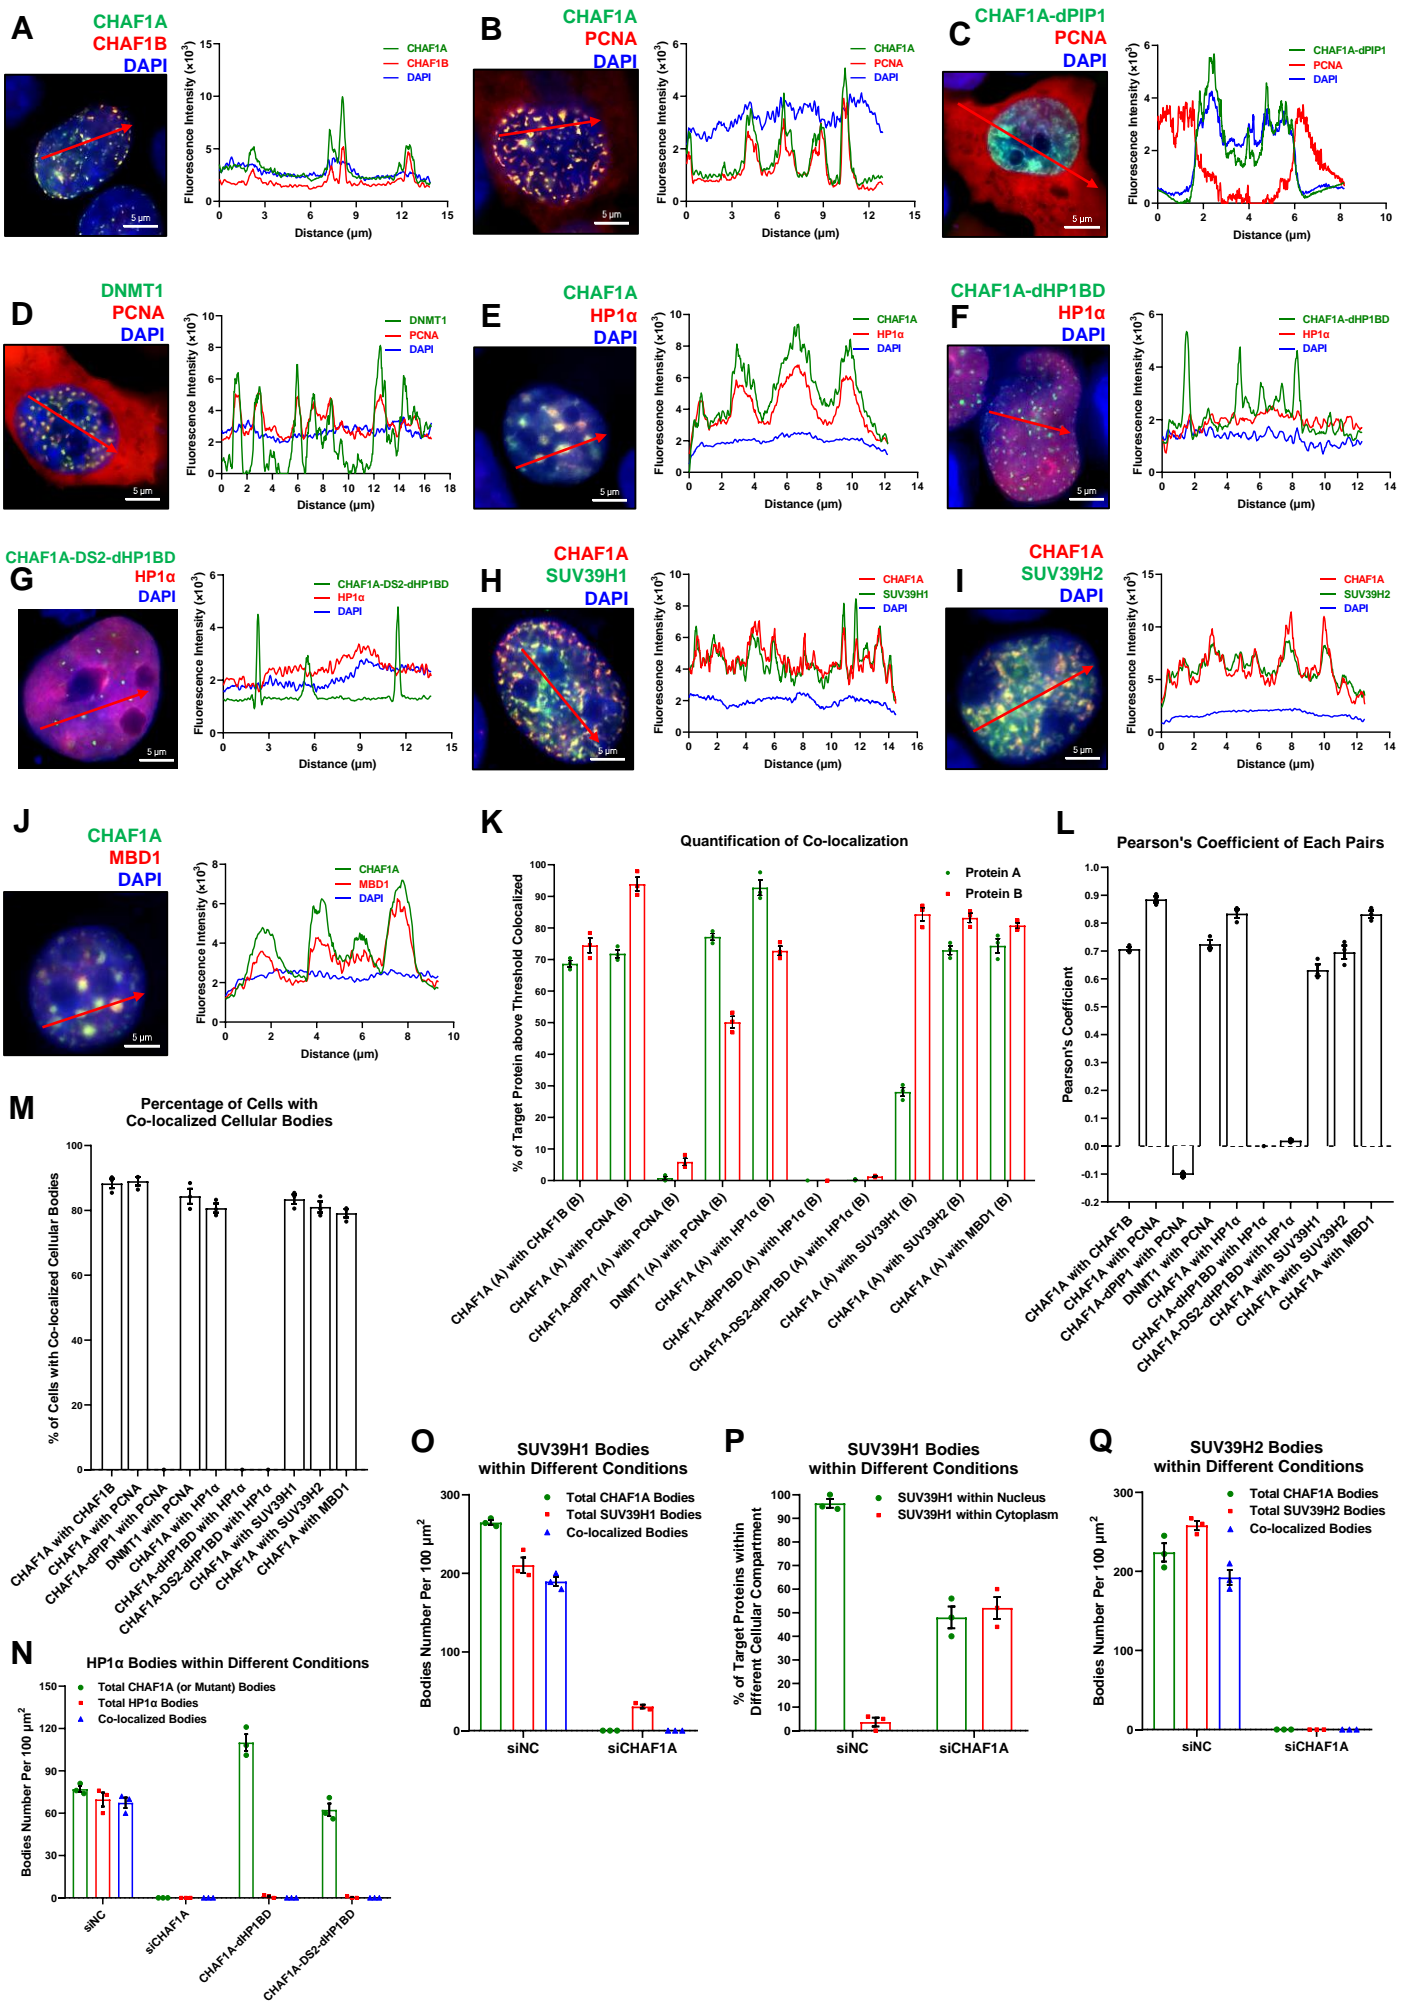

**Appendix Figure S7. Quantification analysis of cellular bodies upon CHAF1A knockdown.**

**A-J** The line scan profiles of SIM images which showed co-localization and non-co-localization between two proteins.

**K** Quantification analysis of co-localization of two proteins. Percentages of target protein above threshold co-localized were calculated by measuring the percentages of co-localized target protein volume in total target protein volume.

**L** Pearson's coefficients in co-localized volume of each protein pairs were calculated based on the quantitation analysis results showed in (K). The co-localization value ranges between 1 and -1. A value of 1 represents perfect co-localization, 0 represents no co-localization, and -1 represents perfect inverse correlation.

**M** The percentages of cells with co-localized cellular bodies.

**N** The numbers of CHAF1A (or CHAF1A mutants) bodies, HP1 $\alpha$  bodies and co-localized bodies per 100  $\mu\text{m}^2$  were measured in both siNC and siCHAF1A conditions.

**O, P** The numbers of CHAF1A bodies, SUV39H1 bodies and co-localized bodies per 100  $\mu\text{m}^2$  were measured in both siNC and siCHAF1A conditions (O). The percentages of SUV39H1 proteins within nucleus and cytoplasm were measured before and after CHAF1A knockdown (P).

**Q** The numbers of CHAF1A bodies, SUV39H2 bodies and co-localized bodies per 100  $\mu\text{m}^2$  were measured in both siNC and siCHAF1A conditions.

Data information: The scale bar of each SIM image represented 5  $\mu\text{m}$ . All the samples were imaged to obtain at least three images. All the merged SIM images used for line scan profiling in (A-J) were from Fig 5A to Fig 5F.

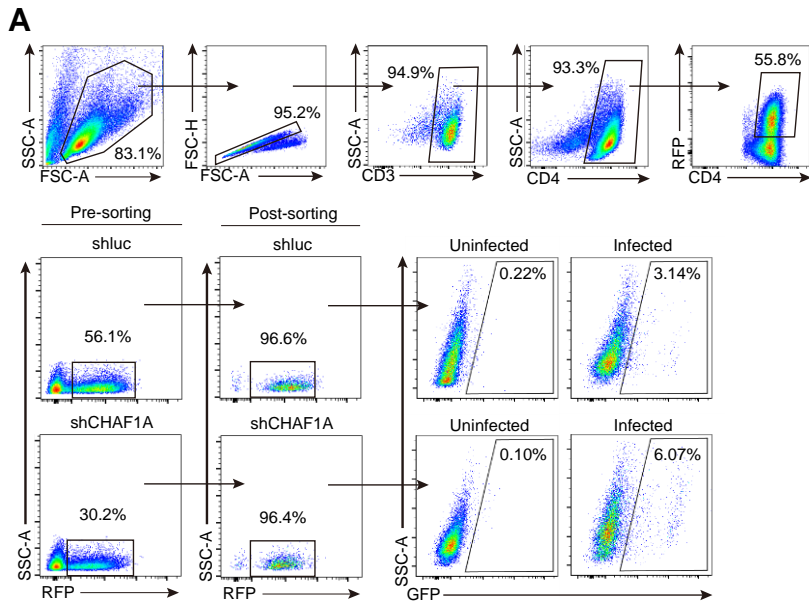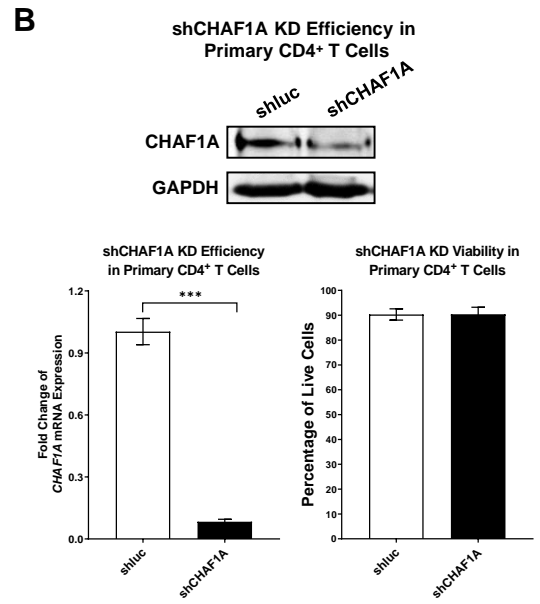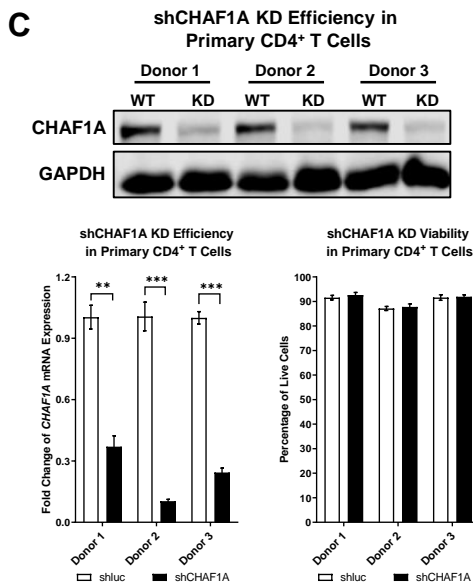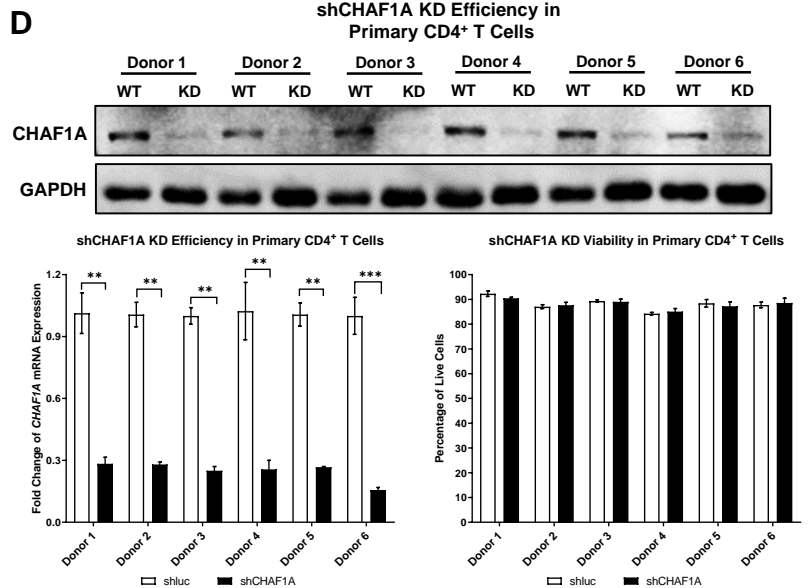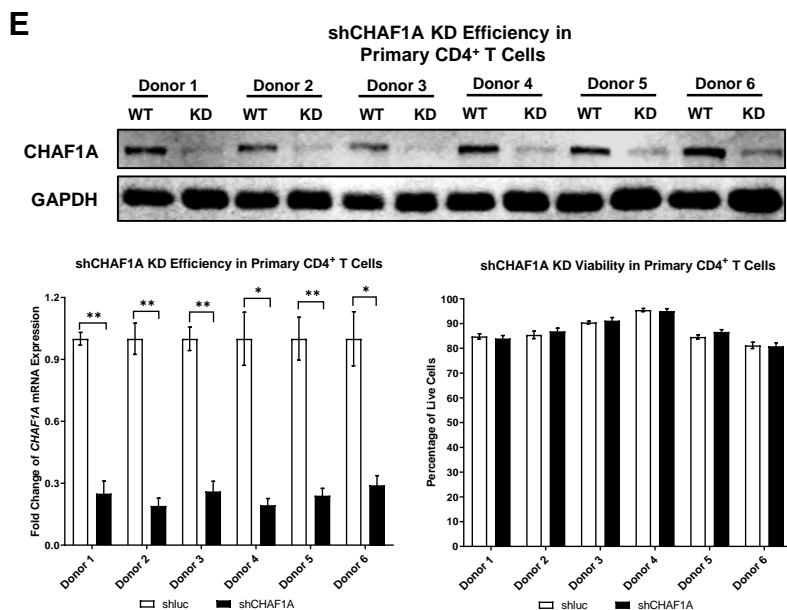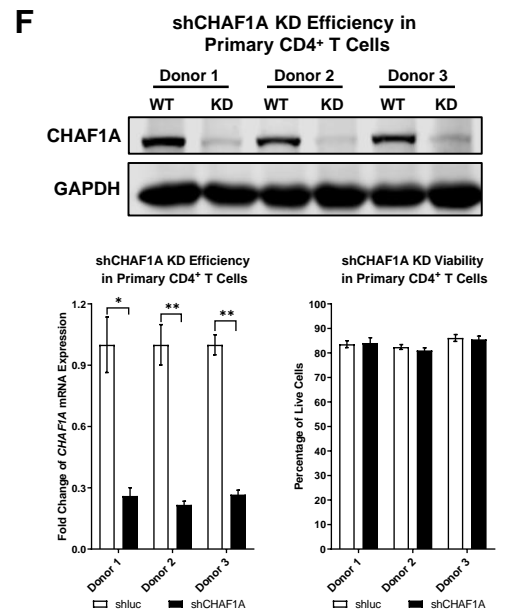



**Appendix Figure S8. Knockdown efficiencies and corresponding viabilities in primary CD4<sup>+</sup> T cells.**

**A** Gating strategies for HIV-1 latency models of primary CD4<sup>+</sup> T cells. Primary CD4<sup>+</sup> T cells were isolated through human CD4<sup>+</sup> T lymphocyte enrichment magnetic cell separation system (MACS). The purities of CD4<sup>+</sup> T cells were ensured at least 90%. Both CD3 and CD4 markers were used to sort RFP-positive CD4<sup>+</sup> T cells by fluorescence-activated cell sorting (FACS) system. RFP-positive CD4<sup>+</sup> T cells were shRNA lentiviruses-infected CD4<sup>+</sup> T cells. The purities of sorted shRNA lentiviruses-infected RFP-positive cells were ensured at least 90% by flow cytometry. The lentiviruses-infected CD4<sup>+</sup> T cells were infected with HIV-1 pseudotyped virus, or untreated (uninfected negative control). The uninfected negative controls were used to gate HIV-1 pseudotyped virus-infected GFP-positive cells.

**B-F** The efficiencies of shCHAF1A-mediated CHAF1A knockdown in primary CD4<sup>+</sup> T cells were confirmed by both WB and qPCR. The viabilities upon CHAF1A knockdown in each group were quantitated by measuring the percentages of amine-reactive fluorescent dye non-permeant cells.

Data information: Data represented mean  $\pm$  SEM in triplicate. p-Values were calculated by Student's *t*-test. \**p* < 0.05, \*\**p* < 0.01, \*\*\**p* < 0.001.

Source data are available online for this figure.
